# Supplementary material for: Recruitment of plasma cells to the bone marrow in primary and secondary immune reactions
Source: Research Square preprint supplement (doi:10.21203/rs.3.rs-2378630/v1), 2023-02-15
Supplement: Supplementary file 1 [file 2fda6b294dce0e1e59b72743.xlsx]

## Sheet: Fig2b
p-values
	Cluster 0	Cluster 1	Cluster 4	Cluster 5	Cluster 6	Cluster 8	Cluster 9	Cluster 11	Cluster 12	Cluster 13
Cluster 0		1	1	1	1	0.095	1	0.402	0.458	0.931
Cluster 1	1		1	1	1	1	1	1	0.996	0.995
Cluster 4	1	1		1	0.992	1	1	1	0.943	0.999
Cluster 5	1	1	1		1	0.993	1	0.609	0.925	0.878
Cluster 6	1	1	0.066	1		0.981	0.896	1	0.871	0.895
Cluster 8	0.197	1	1	0.991	1		0.982	0.266	0.264	0.793
Cluster 9	1	1	1	1	1	0.978		0.993	0.757	0.037
Cluster 11	0.355	1	1	0.504	1	0.209	0.993		0.883	0.691
Cluster 12	0.403	0.992	0.941	0.895	0.989	0.225	0.757	0.883		0.787
Cluster 13	0.932	0.995	0.999	0.877	0.97	0.793	0.037	0.691	0.787

## Sheet: Fig4c_SupFig4c
		Positive Enrichment - MannWhitneyUTest
		BNT d7	BNT d14	BNT/BNT d7	BNT/BNT 7mo	BNT/BNT/BNT d7	AZ d7	AZ d14	AZ/BNT d7	COVID/BNT d7	DTP d7	DTP 6mo
Cluster 0	Cluster 1	1.46251e-11	1	0.880446	0.00533217	1	1.10652e-52	0.200764	7.86775e-05	3.37349e-24	1	0.106
Cluster 0	Cluster 4	7.70557e-06	2.62109e-67	0.00184108	0.000427564	2.88015e-29	3.26585e-109	2.47133e-31	1.83962e-27	2.25669e-18	0.15636	1
Cluster 0	Cluster 5	1.30596e-10	0.0120825	0.317415	1	0.00746223	1	1	1	0.00274494	1	1
Cluster 0	Cluster 6	1	0.0537127	1	0.324229	0.0162446	8.89098e-14	1	1	1.87394e-06	0.00023232	1
Cluster 0	Cluster 8	1	0.602536	1	1	1	1	0.199117	1	1	1	1
Cluster 0	Cluster 9	1	8.0301e-09	8.43838e-32	1	6.6099e-23	1	0.789327	4.98921e-05	1.89206e-10	0.722633	0.53823
Cluster 0	Cluster 11	6.0735e-11	1	1.08538e-10	1	2.16735e-08	1.00612e-09	0.00375256	6.74001e-48	0.00789842	1	1
Cluster 0	Cluster 12	1	1	1	1	1	1	1	1	1	1	1
Cluster 0	Cluster 13	8.65243e-23	2.25368e-10	4.58238e-56	1	3.2116e-35	1	1	1	0.170768	1	1
Cluster 1	Cluster 4	1	8.70252e-36	4.07469e-06	2.45601e-08	1.43866e-23	1.01088e-16	3.13055e-14	1.61474e-08	1	1	0.107968
Cluster 1	Cluster 5	2.66761e-28	0.0407678	0.00246994	0.0732271	0.220721	1.04834e-19	1	0.00869019	9.22787e-06	1	1
Cluster 1	Cluster 6	0.00155905	1	1	1	0.206042	0.0215069	1	1	1	2.15162e-05	1
Cluster 1	Cluster 8	0.0418742	1	0.0439806	0.995864	1	1.21602e-12	1	1	4.01423e-09	1	1
Cluster 1	Cluster 9	0.007888	0.000221896	2.08883e-32	0.0439074	3.60293e-19	1.21681e-11	0.0763038	4.18122e-08	9.10623e-33	0.0323316	1
Cluster 1	Cluster 11	0.000163928	1	3.92053e-13	1	1.30496e-07	1	0.150582	6.98777e-32	1	1	0.0351772
Cluster 1	Cluster 12	1	1	1	0.72327	1	1.73339e-06	1	1	0.00211412	1	1
Cluster 1	Cluster 13	6.11184e-19	6.42137e-08	1.68563e-56	1	2.92381e-35	1	1	1	1.13464e-08	1	0.523063
Cluster 4	Cluster 5	1.3147e-19	1.10873e-21	1	0.0663466	1.59424e-10	1.56481e-59	6.37922e-16	6.47139e-17	1.18998e-05	0.35929	1
Cluster 4	Cluster 6	0.022067	1.22035e-36	3.61681e-05	1.30692e-06	2.04967e-08	2.49397e-25	3.65112e-11	4.48569e-08	1	1.00878e-06	1
Cluster 4	Cluster 8	0.13629	4.30888e-25	1	0.604709	1.24515e-09	1.37088e-37	0.000568973	2.95514e-08	1.51464e-09	1	1
Cluster 4	Cluster 9	0.0377487	1.56123e-41	1.71759e-09	1	1	1.22664e-33	4.98962e-09	4.44082e-16	1.79863e-29	0.00434515	0.251081
Cluster 4	Cluster 11	0.000379691	3.32149e-08	0.00015659	1	1	1	1	3.75958e-15	1	1	1
Cluster 4	Cluster 12	1	0.00169203	1	1	4.29884e-07	1.99722e-17	0.00031796	0.102886	0.000912096	1	1
Cluster 4	Cluster 13	1.48863e-18	4.26038e-15	3.97371e-46	1	1.80422e-22	0.0367463	1	1	8.10595e-10	1	1
Cluster 5	Cluster 6	1.83953e-07	2.48934e-05	0.00770067	0.801405	1	2.00544e-05	1	1	1	0.0268988	1
Cluster 5	Cluster 8	0.000304917	0.00175318	1	1	1	1	1	1	0.745967	1	1
Cluster 5	Cluster 9	0.0093823	7.57207e-12	1.23794e-14	1	3.10062e-09	1	0.442043	0.00085359	7.54602e-15	1	1
Cluster 5	Cluster 11	3.88146e-19	1	1.62502e-06	1	0.000561468	1.27378e-06	0.0241356	6.16749e-40	1	1	1
Cluster 5	Cluster 12	0.000126862	1	1	1	0.683959	1	1	1	1	1	1
Cluster 5	Cluster 13	2.33882e-27	9.21968e-11	9.2297e-49	1	3.72389e-30	1	1	1	0.00119388	1	1
Cluster 6	Cluster 8	1	1	0.0698646	1	1	0.000111205	1	1	0.00412631	0.233976	1
Cluster 6	Cluster 9	1	0.218739	2.25313e-25	0.190488	5.47642e-08	0.000106438	0.107984	5.09467e-06	2.29977e-16	1	1
Cluster 6	Cluster 11	1.36208e-08	1	1.30868e-11	1	0.00134314	0.109275	0.144125	3.22725e-30	1	0.772543	1
Cluster 6	Cluster 12	1	1	1	1	0.728226	0.00332213	1	1	0.263118	0.951426	1
Cluster 6	Cluster 13	1.8629e-21	1.10429e-07	1.95796e-51	1	2.24796e-29	1	1	1	4.41203e-05	1	1
Cluster 8	Cluster 9	1	0.292311	3.53655e-09	1	1.27405e-08	1	0.0112547	0.00218983	0.000112892	1	1
Cluster 8	Cluster 11	2.35524e-07	1	6.60878e-05	1	0.000141154	1.3601e-06	1	7.33282e-28	0.0539022	1	1
Cluster 8	Cluster 12	1	1	1	1	1	1	1	1	1	1	1
Cluster 8	Cluster 13	7.44937e-20	1.155e-07	1.20164e-41	1	2.2255e-28	1	1	1	0.32273	1	1
Cluster 9	Cluster 11	9.04631e-08	0.648379	1	1	1	1.01831e-06	0.00218084	6.1226e-31	1.81335e-09	1	0.20004
Cluster 9	Cluster 12	1	1	0.00238991	1	3.28461e-06	1	1	0.00540013	0.522648	1	1
Cluster 9	Cluster 13	1.50396e-19	1.34125e-05	6.69654e-33	1	6.23475e-18	1	1	1	1	1	1
Cluster 11	Cluster 12	0.120487	1	0.0137254	1	0.000103568	2.51879e-05	0.221234	3.71916e-12	0.391154	1	1
Cluster 11	Cluster 13	6.79546e-06	6.67097e-06	1.67965e-21	1	3.02675e-12	0.777338	1	1	8.90543e-05	1	1
Cluster 12	Cluster 13	2.68296e-12	6.92028e-05	6.65493e-26	1	9.84812e-22	1	1	1	1	1	1

## Sheet: SupFig4f
SPIKE		Positive Enrichment - MannWhitneyUTest
		BNT d14	BNT/BNT d7	BNT/BNT 7mo	BNT/BNT/BNT d7	COVID/BNT d7
Cluster 0	Cluster 1	1.51126e-11	1.51126e-11	1.51126e-11	1.51126e-11	1.51126e-11
Cluster 0	Cluster 4	1	1	1	1	1
Cluster 0	Cluster 5	1	1	1	1	1
Cluster 0	Cluster 6	0.0129834	0.0129834	0.0129834	0.0129834	0.0129834
Cluster 0	Cluster 8	1	1	1	1	1
Cluster 0	Cluster 9	0.244796	0.244796	0.244796	0.244796	0.244796
Cluster 0	Cluster 11	1	1	1	1	1
Cluster 0	Cluster 12	1	1	1	1	1
Cluster 0	Cluster 13	NaN	NaN	NaN	NaN	NaN
Cluster 1	Cluster 4	2.87822e-09	2.87822e-09	2.87822e-09	2.87822e-09	2.87822e-09
Cluster 1	Cluster 5	5.47574e-07	5.47574e-07	5.47574e-07	5.47574e-07	5.47574e-07
Cluster 1	Cluster 6	1	1	1	1	1
Cluster 1	Cluster 8	1	1	1	1	1
Cluster 1	Cluster 9	0.000420321	0.000420321	0.000420321	0.000420321	0.000420321
Cluster 1	Cluster 11	1	1	1	1	1
Cluster 1	Cluster 12	1	1	1	1	1
Cluster 1	Cluster 13	NaN	NaN	NaN	NaN	NaN
Cluster 4	Cluster 5	1	1	1	1	1
Cluster 4	Cluster 6	0.00223668	0.00223668	0.00223668	0.00223668	0.00223668
Cluster 4	Cluster 8	1	1	1	1	1
Cluster 4	Cluster 9	1	1	1	1	1
Cluster 4	Cluster 11	1	1	1	1	1
Cluster 4	Cluster 12	1	1	1	1	1
Cluster 4	Cluster 13	NaN	NaN	NaN	NaN	NaN
Cluster 5	Cluster 6	0.0525097	0.0525097	0.0525097	0.0525097	0.0525097
Cluster 5	Cluster 8	1	1	1	1	1
Cluster 5	Cluster 9	0.589518	0.589518	0.589518	0.589518	0.589518
Cluster 5	Cluster 11	1	1	1	1	1
Cluster 5	Cluster 12	1	1	1	1	1
Cluster 5	Cluster 13	NaN	NaN	NaN	NaN	NaN
Cluster 6	Cluster 8	1	1	1	1	1
Cluster 6	Cluster 9	0.00549391	0.00549391	0.00549391	0.00549391	0.00549391
Cluster 6	Cluster 11	1	1	1	1	1
Cluster 6	Cluster 12	1	1	1	1	1
Cluster 6	Cluster 13	NaN	NaN	NaN	NaN	NaN
Cluster 8	Cluster 9	0.193214	0.193214	0.193214	0.193214	0.193214
Cluster 8	Cluster 11	1	1	1	1	1
Cluster 8	Cluster 12	1	1	1	1	1
Cluster 8	Cluster 13	NaN	NaN	NaN	NaN	NaN
Cluster 9	Cluster 11	0.29871	0.29871	0.29871	0.29871	0.29871
Cluster 9	Cluster 12	1	1	1	1	1
Cluster 9	Cluster 13	NaN	NaN	NaN	NaN	NaN
Cluster 11	Cluster 12	1	1	1	1	1
Cluster 11	Cluster 13	NaN	NaN	NaN	NaN	NaN
Cluster 12	Cluster 13	NaN	NaN	NaN	NaN	NaN
