# Supplementary material for: Recruitment of plasma cells to the bone marrow in primary and secondary immune reactions
Source: Research Square preprint supplement (doi:10.21203/rs.3.rs-2378630/v1), 2023-02-15
Supplement: Supplementary file 2 [file 520d6c78110c65962c97ce80.xlsx]

## Sheet: Sheet1
			COVID-19 Diagnosis	COVID-19 Vaccination					Time between COVID-19 and DTP boost	DTP Vaccination	scSequencing
			Time before analysis	1st dose	Time between doses	2nd dose	Time between doses	3rd dose		Time since previous boost	Analysis time points		Time points	1	d7 after 1st dose
ID	Age	Sex												2	d14 after 1st dose
11	31	Male	na	Comirnaty	4wks	Comirnaty	9mo	Comirnaty	na	na	1, 2, 4, 5			3	d7 after 2nd dose
12	36	Male	na	Comirnaty	3wks	Comirnaty			na	na	1, 2, 3			4	7mo after 2nd dose
13	31	Male	na	Comirnaty	3wks	Comirnaty			na	na	1, 2, 3			5	d7 after 3rd dose
14	35	Male	na	Comirnaty	4wks	Comirnaty			na	na	1, 2			6	d7 after DTP boost
15	46	Male	na	Comirnaty	3wks	Comirnaty			na	na	1, 2, 3			7	6mo after DTP boost
16	51	Male	na	Comirnaty	3wks	Comirnaty			na	na	1, 2, 3
17	30	Male	na	Comirnaty	4wks	Comirnaty			na	na	1, 2
21	32	Male	na	Comirnaty	3wks	Comirnaty			na	na	1, 2, 3, 4, 5
22	34	Female	na	Comirnaty	3wks	Comirnaty			na	na	1, 2, 3
23	45	Female	na	Comirnaty	3wks	Comirnaty			na	na	1, 2, 3
24	41	Female	na	Comirnaty	3wks	Comirnaty			na	na	1, 2, 3, 4
25	41	Female	na	Comirnaty	3wks	Comirnaty	9mo	Comirnaty	na	na	1, 2, 3, 4, 5
26	27	Male	na	Comirnaty	3wks	Comirnaty			na	na	1, 2, 3
27	39	Female	na	Comirnaty	3wks	Comirnaty	9mo	Comirnaty	na	na	1, 2, 3, 4, 5
28	54	Male	na	Comirnaty	3wks	Comirnaty			na	na	1, 2, 3
31	83	Female	na	Comirnaty	3wks	Comirnaty			na	na	2, 3, 4
32	84	Male	na	Comirnaty	3wks	Comirnaty			na	na	2, 3, 4
33	32	Female	not known	Comirnaty	3wks	Comirnaty			na	na	2, 3
51	42	Female	na	Vaxzevria	12wks	Comirnaty			na	na	1, 2, 3
52	32	Female	na	Vaxzevria	-	-			na	na	1, 2
53	30	Male	na	Vaxzevria	12wks	Comirnaty			na	na	1, 2, 3
54	30	Male	na	Vaxzevria	12wks	Comirnaty			na	na	1, 2, 3
55	31	Male	na	Vaxzevria	12wks	Comirnaty			na	na	1, 2, 3
56	31	Female	na	Vaxzevria	12wks	Comirnaty			na	na	1, 2, 3
57	28	Female	na	Vaxzevria	12wks	Comirnaty			na	na	1, 2, 3					Subject
58	36	Male	na	Vaxzevria	12wks	Comirnaty			na	na	1, 2, 3
C1	47	Female	2mo	Comirnaty	-	-			na	na	1
C2	21	Male	4mo	Comirnaty	-	-			na	na	1
C3	34	Female	13mo	Comirnaty	-	-			na	na	1
T1	47	Male	na	Vaxzevria	12wks	Comirnaty			12wks	19yrs	6.7
T2	26	Female	17mo	Vaxzevria	12wks	Comirnaty			19wks	11yrs	6.7
T3	25	Female	12mo	Comirnaty	6wks	Comirnaty			12wks	11yrs	6.7
T5	31	Female	na	Vaxzevria	12wks	Comirnaty			19wks	9yrs	6.7
T6	29	Male	na	Vaxzevria	12wks	Comirnaty			14wks	8yrs	6.7
T7	30	Male	na	Vaxzevria	9wks	Comirnaty			18wks	8yrs	6.7
