# Supplementary material for: Recruitment of plasma cells to the bone marrow in primary and secondary immune reactions
Source: Research Square preprint supplement (doi:10.21203/rs.3.rs-2378630/v1), 2023-02-15
Supplement: Supplementary file 3 [file 6262a2bd733901710c7e4acc.xlsx]

## Sheet: Sheet1
BNT d7	BNT d14	BNT/BNT d7	BNT/BNT 7mo	BNT/BNT/BNT d7	AZ d7	AZ d14	AZ/BNT d7	COVID/BNT d7	DTP d7	DTP 6mo
A1BG	7SK.2	AASDH	GZMA	HRASLS2	7SK.2	A1BG	7SK.2	ATP5E	DDOST	ATP5D
ABCC10	A1BG	ABCC1	KLRB1	RPL12	A1BG	A1BG-AS1	A1BG	ATP5I	MTRNR2L8	CAPN2
ABCD1	A1BG-AS1	ABHD14A	PPDPF	RPL26	A1BG-AS1	A2M	A1BG-AS1	C19orf10	PPIB	CCR9
ABHD12	AAAS	AC009133.12	RAC2	RPS4X	A2M	AAAS	AAAS	CD38	RPS18	EEF2
ABHD4	AACS	AC022182.1	RP11-731F5.2		AAAS	AACS	AACS	COX6B1	SEC11C	FDX1
ABI2	AAGAB	ACTA2	RPS4X		AACS	AAGAB	AAGAB	DDOST		ISG20
ABTB1	AAK1	ADAT1	S100A6		AAED1	AAMDC	AAK1	HLA-C		ITGB1
AC002117.1	AAMDC	ADAT2	SRGN		AAGAB	AAMP	AAMDC	IDH2		NME1-NME2
AC007383.3	AAR2	ADCY7	SYNGR2		AAK1	AAR2	AAMP	LMAN2		PCBP2
AC007386.2	AARS2	AGAP2	TMSB4X		AAMDC	AARS	AAR2	MT-ATP6		RP11-731F5.2
AC009133.12	AARSD1	AGAP8	VIM		AAMP	AARS2	AARS	MT-CO3		RPL26
AC009133.17	AASDH	AK8			AAR2	AASDH	AARS2	MT-ND3		RPL36
AC009495.2	AASDHPPT	ALDH1L2			AARS	AASDHPPT	AARSD1	MT-ND4		RPL39
AC011997.1	AATF	ALG10B			AARS2	AATF	AASDH	MTDH		RPS15A
AC022182.1	ABCA5	ANKRD13D			AARSD1	ABCA5	AASDHPPT	NDUFA1		RPS21
AC026202.3	ABCA7	AP000769.1			AASDH	ABCA7	AATF	NDUFA3		RPS27
AC027763.2	ABCB10	APOBEC3H			AASDHPPT	ABCB10	ABAT	OST4		S100A6
AC084018.1	ABCB7	ARHGAP27			AATF	ABCB7	ABCA1	P4HB		SH3BP5
AC091729.9	ABCC1	ARL11			ABAT	ABCB8	ABCA5	POLR2L		TXNDC11
AC092295.7	ABCC10	ARL13B			ABCA1	ABCC1	ABCA7	ROMO1		VIM
AC093818.1	ABCC4	ARMC5			ABCA5	ABCC10	ABCB10	RPL13
AC109826.1	ABCC5	ASB16-AS1			ABCA7	ABCC4	ABCB7	RPL26
AC159540.1	ABCD1	ATF7			ABCB1	ABCC5	ABCB8	RPL36
ACBD4	ABCD2	ATG9A			ABCB10	ABCD1	ABCB9	RPL36A
ACOT2	ABCD3	ATHL1			ABCB7	ABCD3	ABCC1	RPL37
ACOT4	ABCD4	ATL1			ABCB8	ABCD4	ABCC10	RPL37A
ACP6	ABCE1	ATXN3			ABCC1	ABCE1	ABCC4	RPL41
ACSS1	ABCF1	BBS9			ABCC10	ABCF1	ABCC5	RPLP2
ADCK1	ABCF2	BCDIN3D			ABCC4	ABCF2	ABCD1	RPN2
ADPRH	ABCF3	BCL2			ABCC5	ABCF3	ABCD2	RPS19
AFMID	ABHD10	BCL2A1			ABCD1	ABHD10	ABCD3	RPS21
AGMAT	ABHD11	BEX2			ABCD2	ABHD11	ABCD4	RPS26
AKT1S1	ABHD13	BEX5			ABCD3	ABHD13	ABCE1	RPS27
AL592183.1	ABHD14A	BMI1			ABCD4	ABHD14A	ABCF1	RPS28
ALDH5A1	ABHD16A	BMP8B			ABCE1	ABHD14B	ABCF2	RPS29
ALS2	ABHD17B	C11orf49			ABCF1	ABHD15	ABCF3	SEC62
AMMECR1	ABHD2	C12orf55			ABCF2	ABHD16A	ABHD10	SERF2
ANKMY2	ABHD3	C18orf25			ABCF3	ABHD17A	ABHD11	TMA7
ANKRA2	ABHD4	C19orf83			ABHD10	ABHD17B	ABHD12	TMEM258
ANKRD13A	ABHD5	C1QTNF6			ABHD11	ABHD2	ABHD13	TOP1
ANKRD36	ABHD8	C21orf119			ABHD12	ABHD3	ABHD14A	UBL5
ANKRD36C	ABI1	C2orf42			ABHD13	ABHD4	ABHD14B	UQCR11.1
ANKRD49	ABI2	C2orf44			ABHD14A	ABHD5	ABHD15	UQCRQ
ANKS3	ABI3	C3orf14			ABHD14B	ABI1	ABHD16A
ANTXR2	ABL2	C4orf33			ABHD15	ABI2	ABHD17A
AP000769.1	ABLIM1	C5orf28			ABHD16A	ABI3	ABHD17B
AP001055.6	ABT1	C5orf30			ABHD17A	ABL2	ABHD2
AP001058.3	ABTB1	C5orf55			ABHD17B	ABT1	ABHD3
AP1AR	AC002117.1	C9orf64			ABHD2	ABTB1	ABHD4
AP4M1	AC002310.12	CAMK1D			ABHD3	AC002117.1	ABHD5
APBB3	AC002467.7	CAPN10-AS1			ABHD4	AC002310.12	ABHD6
APC	AC005037.3	CAPRIN2			ABHD5	AC005037.3	ABHD8
APLF	AC006129.1	CARD6			ABHD6	AC006129.2	ABI1
APOBEC3D	AC007246.3	CBY1			ABHD8	AC006129.4	ABI2
APOBEC3F	AC007383.3	CCDC106			ABI1	AC006942.4	ABI3
APOL6	AC007386.2	CCDC110			ABI2	AC006994.2	ABL1
ARHGAP1	AC009133.12	CCDC126			ABI3	AC007246.3	ABL2
ARHGAP12	AC009133.17	CCDC14			ABL1	AC007383.3	ABLIM1
ARHGAP6	AC009299.3	CCDC142			ABL2	AC007386.2	ABR
ARHGEF18	AC009403.2	CCDC180			ABLIM1	AC009133.12	ABRACL
ARHGEF19	AC009495.2	CCRL2			ABR	AC009133.17	ABT1
ARIH2OS	AC009948.5	CDC25C			ABT1	AC009299.3	ABTB1
ARL2	AC010226.4	CDC37L1			ABTB1	AC009403.2	AC000068.5
ARL4A	AC010642.1	CDH23			ABTB2	AC009495.2	AC002116.7
ARMC2	AC011043.1	CDYL			AC000032.2	AC010226.4	AC002117.1
ARNT	AC011841.1	CENPB			AC000068.5	AC010642.1	AC002310.12
ARRDC3	AC011997.1	CHAC1			AC002116.7	AC016700.5	AC002467.7
ARSG	AC016700.5	CLEC2B			AC002117.1	AC017002.2	AC004381.6
ASXL1	AC017002.2	CNTROB			AC002310.12	AC022182.1	AC004951.6
ATAD3C	AC022182.1	CPED1			AC002467.7	AC026202.3	AC005037.3
ATE1	AC022182.3	CR1			AC002480.3	AC026806.2	AC005076.5
ATF5	AC025171.1	CR2			AC003665.1	AC027763.2	AC005523.2
ATG9A	AC026202.3	CRCP			AC004158.2	AC062017.1	AC005944.2
ATP10D	AC027763.2	CTA-211A9.5			AC004381.6	AC062029.1	AC006129.1
ATP11A	AC062017.1	CTA-217C2.1			AC004466.1	AC074289.1	AC006129.2
ATP6V0A1	AC062029.1	CTC-241F20.3			AC004951.6	AC074389.9	AC006129.4
ATP6V0E2	AC074289.1	CTC-444N24.11			AC005037.3	AC084018.1	AC006942.4
ATXN2	AC074389.9	CTD-2509G16.5			AC005076.5	AC091729.9	AC006994.2
ATXN7L3B	AC079807.2	CYB5D1			AC005523.2	AC092295.7	AC007246.3
AVEN	AC084018.1	CYFIP1			AC006129.1	AC093818.1	AC007381.3
B3GALT4	AC084219.4	CYP2R1			AC006129.2	AC104024.1	AC007383.3
B3GNT2	AC084809.2	DBT			AC006129.4	AC104699.1	AC007386.2
BAG5	AC091729.9	DCTN6			AC006942.4	AC109826.1	AC007773.2
BAZ2B	AC092295.7	DDIT4			AC006994.2	AC113189.5	AC009005.2
BBC3	AC093818.1	DDX19B			AC007246.3	AC132192.1	AC009065.1
BBS9	AC104024.1	DDX3Y			AC007255.8	AC139887.4	AC009133.12
BCAS3	AC104699.1	DNAJB4			AC007381.3	AC142528.1	AC009133.17
BCDIN3D	AC104820.2	EEF1E1			AC007383.3	AC159540.1	AC009299.3
BCKDHB	AC109826.1	EFNA4			AC007386.2	ACAA1	AC009403.2
BCL2	AC113189.5	ELK4			AC007773.2	ACAA2	AC009495.2
BCL2A1	AC131097.3	ELL2			AC007879.5	ACACA	AC009948.5
BDH2	AC132192.1	ELMO2			AC009005.2	ACAD10	AC009961.3
BEX2	AC147651.4	ELMOD3			AC009065.1	ACAD11	AC010226.4
BEX5	AC159540.1	ENPP4			AC009133.12	ACAD8	AC010642.1
BICD1	ACAA1	EPB41L4A			AC009133.14	ACAD9	AC011043.1
BLZF1	ACAA2	ERMARD			AC009133.17	ACADM	AC012123.1
BMP8B	ACACA	ERV3-1			AC009299.3	ACADS	AC012314.8
BOLA2B	ACAD10	ETV6			AC009403.2	ACADSB	AC012487.2
BRAF	ACAD11	EYA2			AC009404.2	ACADVL	AC015987.2
BROX	ACAD8	EZH1			AC009495.2	ACAP1	AC016700.5
BTN2A2	ACAD9	FAM114A1			AC009948.5	ACAP2	AC016745.3
BTN3A1	ACADS	FAM175B			AC009961.3	ACAP3	AC017002.2
C10orf128	ACADSB	FAM185A			AC010226.4	ACAT1	AC022182.1
C10orf32	ACAP2	FAM200A			AC010642.1	ACAT2	AC022182.3
C11orf49	ACAP3	FAM222B			AC010894.3	ACBD3	AC024592.12
C11orf54	ACAT2	FAM47E-STBD1.1			AC011043.1	ACBD4	AC025171.1
C11orf63	ACBD3	FASTKD3			AC011841.1	ACBD5	AC026202.3
C14orf28	ACBD4	FBXO16			AC012123.1	ACBD6	AC026806.2
C14orf93	ACBD5	FBXO48			AC012309.5	ACD	AC027763.2
C15orf65	ACBD6	FITM2			AC012314.8	ACIN1	AC040977.1
C16orf74	ACER3	FKBP1C			AC012487.2	ACLY	AC062017.1
C16orf86	ACIN1	FKTN			AC016700.5	ACN9	AC062029.1
C16orf87	ACLY	FOCAD			AC017002.2	ACO1	AC074117.10
C17orf70	ACN9	FOXK2			AC018766.5	ACOT13	AC074138.3
C1RL	ACO1	FURIN			AC022182.1	ACOT2	AC074289.1
C1orf54	ACOT13	FZD7			AC022182.3	ACOT4	AC074389.9
C1orf56	ACOT2	G0S2			AC024592.12	ACOT7	AC084018.1
C22orf34	ACOT4	GABPB2			AC024940.1	ACOT8	AC084219.4
C3orf17	ACOT7	GATC			AC025171.1	ACOT9	AC090587.5
C4orf33	ACOT8	GBP1			AC026202.3	ACOX1	AC091729.9
C4orf36	ACOT9	GCC1			AC026806.2	ACOX3	AC092162.1
C5orf45	ACOX1	GGT1			AC027763.2	ACP2	AC092295.7
C6orf48	ACOX3	GNE			AC040977.1	ACP5	AC093391.2
C7orf13	ACP2	GPR15			AC062017.1	ACP6	AC093818.1
C7orf31	ACP6	GSN			AC062029.1	ACSF2	AC097721.2
C7orf60	ACSF2	GSTT1			AC073072.5	ACSF3	AC103801.2
C9orf91	ACSL1	HARBI1			AC074117.10	ACSL3	AC104024.1
CA5B	ACSL3	HAUS6			AC074138.3	ACSL4	AC104699.1
CAMK1D	ACSL4	HCG11			AC074212.5	ACSL5	AC104820.2
CAMK4	ACSL5	HEATR6			AC074289.1	ACSS1	AC108488.4
CAMKMT	ACSS1	HIST1H2BG			AC074389.9	ACTA2	AC109826.1
CAPN12	ACTA2	HKR1			AC074391.1	ACTL10	AC113189.5
CAPNS1	ACTL6A	HLA-DOB			AC084018.1	ACTL6A	AC115618.1
CAPRIN2	ACTR10	HNRNPU-AS1			AC084219.4	ACTN4	AC120194.1
CARF	ACTR1B	HNRNPUL2			AC084809.2	ACTR10	AC131971.1
CBLL1	ACTR3C	HOMER3			AC090587.5	ACTR1A	AC132192.1
CBX7	ACTR5	HSBP1L1			AC091132.1	ACTR1B	AC139887.4
CBY1	ACTR6	HSPA1A			AC091729.9	ACTR2	AC144449.1
CC2D1A	ACTR8	HSPA1B			AC092159.2	ACTR3	AC147651.4
CCDC110	ACVR1	HSPBAP1			AC092162.1	ACTR3C	AC159540.1
CCDC122	ACY1	HYLS1			AC092295.7	ACTR5	ACAA1
CCDC146	ACYP1	IFIT1			AC093388.3	ACTR6	ACAA2
CCND2	ACYP2	IGF2BP3			AC093391.2	ACTR8	ACACA
CD81	AD000090.2	IMMP2L			AC093818.1	ACY1	ACAD10
CD82	ADAL	INADL			AC097662.2	ACY3	ACAD11
CD86	ADAM15	INPP5F			AC097721.2	ACYP1	ACAD8
CD99L2	ADAM17	IRAK2			AC103801.2	ACYP2	ACAD9
CDC14B	ADAM28	IRF2BP2			AC104024.1	AD000090.2	ACADM
CDC37L1	ADAM8	IRF9			AC104024.2	ADA	ACADS
CDHR3	ADAMTS6	KANK1			AC104134.2	ADAL	ACADSB
CDPF1	ADARB1	KCTD6			AC104699.1	ADAM10	ACAP1
CENPC	ADAT1	KDELR2			AC104820.2	ADAM15	ACAP2
CEP44	ADAT3	KIAA0355			AC105760.2	ADAM17	ACAP3
CEP70	ADCK1	KLF7			AC108488.4	ADAM19	ACAT1
CFL2	ADCK3	LIG4			AC109826.1	ADAM28	ACAT2
CGRRF1	ADCK4	LIN37			AC113189.5	ADAM8	ACBD3
CHAC1	ADCK5	LL22NC03-2H8.5			AC115618.1	ADAR	ACBD4
CHCHD6	ADCY3	LLGL2			AC120194.1	ADAT1	ACBD5
CHIC1	ADCY7	LPP			AC123768.4	ADAT3	ACBD6
CHKB	ADD1	LRIG2			AC131971.1	ADCK1	ACCS
CHM	ADIPOR2	LRRC8C			AC132192.1	ADCK3	ACD
CHMP1B	ADK	LRRIQ3			AC138517.1	ADCK4	ACER3
CLIP4	ADNP	LTBP4			AC139887.4	ADCK5	ACIN1
CLK4	ADNP2	LTK			AC142381.1	ADCY7	ACLY
CMTR2	ADORA2A	MAGED1			AC142528.1	ADD1	ACN9
CNOT6L	ADPGK	MAP3K3			AC144449.1	ADD3	ACO1
COL18A1	ADPRH	MARK2			AC145212.1	ADH5	ACO2
COL4A3	ADPRHL2	MBLAC2			AC147651.4	ADI1	ACOT13
COL4A4	ADPRM	MED23			AC159540.1	ADIPOR1	ACOT2
COL9A2	ADRB2	MEPCE			ACAA1	ADIPOR2	ACOT4
COQ7	ADRBK1	MEST			ACAA2	ADK	ACOT7
CPAMD8	ADSS	METTL18			ACACA	ADNP	ACOT8
CPQ	AEBP2	METTL2A			ACAD10	ADORA2A	ACOT9
CPT1A	AEN	METTL6			ACAD11	ADPGK	ACOX1
CR1	AF127936.5	MGST2			ACAD8	ADPRH	ACOX3
CRAT	AFF1	MIER3			ACAD9	ADPRHL2	ACOXL
CREB3L4	AFF4	MIS12			ACADM	ADPRM	ACP1
CREBRF	AFG3L2	MOB3B			ACADS	ADRBK1	ACP2
CREG1	AFMID	MOSPD2			ACADSB	ADSL	ACP5
CRHR1	AGA	MROH8			ACADVL	ADSS	ACP6
CRY2	AGAP2	MRPL53			ACAP1	ADTRP	ACRBP
CRYL1	AGAP8	MSANTD4			ACAP2	AEBP2	ACRC
CSF2RB	AGFG1	MT-ND2			ACAP3	AEN	ACSBG1
CSGALNACT2	AGGF1	MT-ND3			ACAT1	AES	ACSF2
CSNK1G3	AGK	MT-ND4L			ACAT2	AF127936.5	ACSF3
CSNK2A2	AGL	MT-ND5			ACBD3	AFF1	ACSL1
CSRNP1	AGMAT	MTA3			ACBD4	AFF4	ACSL3
CSTF2T	AGO1	MTM1			ACBD5	AFG3L2	ACSL4
CTB-41I6.1	AGO3	MTMR10			ACBD6	AFMID	ACSL5
CTC-444N24.11	AGO4	MTPAP			ACCS	AFTPH	ACSS1
CTD-2020K17.4	AGPAT1	MTRNR2L12			ACD	AGA	ACTA2
CTD-2037K23.2	AGPAT2	NAALADL1			ACER3	AGAP2	ACTL10
CTD-2353F22.1	AGPAT3	NAPEPLD			ACIN1	AGAP8	ACTL6A
CTD-2509G16.5	AGPAT4	NBPF1			ACLY	AGBL3	ACTN4
CTD-2521M24.9	AGPAT5	NDUFB8.1			ACN9	AGBL5	ACTR10
CTNNA1	AGPAT6	NICN1			ACO1	AGGF1	ACTR1A
CTNS	AGPS	NMB			ACOT13	AGK	ACTR1B
CTSF	AGTPBP1	NPIPB4			ACOT2	AGL	ACTR2
CTSO	AGTRAP	NPIPB5			ACOT4	AGMAT	ACTR3
CXorf56	AHCTF1	NPIPB6			ACOT7	AGO3	ACTR3C
CYFIP1	AHCYL1	NUDT14			ACOT8	AGPAT1	ACTR5
CYHR1	AHI1	NUDT3			ACOT9	AGPAT2	ACTR6
CYP4V2	AHSA1	NUP43			ACOX1	AGPAT5	ACTR8
CYSLTR1	AHSA2	NXN			ACOX3	AGPAT6	ACVR1
CYTH4	AIDA	PANK3			ACOXL	AGPS	ACY1
DBP	AIFM1	PAPOLG			ACP1	AGTPBP1	ACY3
DCAF16	AIFM2	PCYOX1			ACP2	AGTRAP	ACYP1
DDIT3	AIG1	PDE7A			ACP5	AHCTF1	ACYP2
DDX58	AIM1	PFKFB2			ACP6	AHCY	AD000090.2
DENND2C	AIM2	PIBF1			ACPL2	AHCYL1	ADA
DENND3	AIMP1	PIK3CA			ACRBP	AHI1	ADAL
DEPTOR	AIMP2	PIK3CD			ACRC	AHSA1	ADAM10
DHRSX	AK3	PIP4K2A			ACSBG1	AHSA2	ADAM15
DLG1	AK9	PITPNA			ACSF2	AIDA	ADAM17
DLGAP4	AKAP1	PLA2G6			ACSF3	AIFM1	ADAM19
DMTF1	AKAP10	PLCXD2			ACSL1	AIFM2	ADAM28
DMXL1	AKAP11	PNPLA6			ACSL3	AIG1	ADAM8
DNAJC14	AKAP17A	POC5			ACSL4	AIM2	ADAM9
DNAJC16	AKAP2	POLG2			ACSL5	AIMP1	ADAP2
DNMBP	AKAP8	POLR1C			ACSM3	AIMP2	ADAR
DNTTIP2	AKAP8L	PPM1M			ACSS1	AIP	ADARB1
DPEP2	AKIP1	PPP1R12B			ACSS2	AK2	ADAT1
DPF3	AKIRIN1	PPP1R35			ACTA2	AK3	ADAT2
DSTYK	AKR7A2	PREX1			ACTL10	AK9	ADAT3
DTNB	AKT1S1	PRMT6			ACTL6A	AKAP10	ADCK1
DUSP1	AKT2	PRUNE			ACTN4	AKAP11	ADCK3
DUSP5	AKTIP	PTER			ACTR10	AKAP13	ADCK4
DUSP6	AL109761.5	PTOV1			ACTR1A	AKAP17A	ADCK5
DYNC2LI1	AL592183.1	PTPRA			ACTR1B	AKAP2	ADCY3
DYRK1B	AL928768.3	PURA			ACTR3C	AKAP8	ADCY7
EBNA1BP2	ALAD	PUS10			ACTR5	AKAP8L	ADD1
EFCAB4A	ALAS1	PXN			ACTR6	AKIP1	ADD3
EFCAB7	ALCAM	PYCR2			ACTR8	AKIRIN1	ADH5
EFHC1	ALDH16A1	R3HCC1L			ACVR1	AKIRIN2	ADI1
EID2B	ALDH1B1	RAB21			ACVR1C	AKNA	ADIPOR1
EIF2AK3	ALDH1L2	RAD54B			ACY1	AKR1B1	ADIPOR2
EIF3J-AS1	ALDH3A2	RANBP9			ACY3	AKR7A2	ADK
EIF4E3	ALDH5A1	RAP2A			ACYP1	AKT1	ADM
ELK3	ALDH6A1	RASSF3			ACYP2	AKT1S1	ADNP
ELP2	ALDH9A1	RBKS			AD000090.2	AKT2	ADNP2
ELP5	ALDOC	RBM12B			AD000671.6	AKTIP	ADORA2A
EMB	ALG10	RBM15B			ADA	AL109761.5	ADPGK
EML5	ALG10B	RBM38			ADAL	AL122127.25	ADPGK-AS1
EML6	ALG11	RFX1			ADAM10	AL139099.1	ADPRH
ENDOV	ALG12	RGL2			ADAM15	AL928768.3	ADPRHL2
ENOX2	ALG13	RMND5A			ADAM17	ALAD	ADPRM
ENTHD2	ALG14	RNASEL			ADAM19	ALAS1	ADRB2
ENTPD3-AS1	ALG6	RNF103			ADAM28	ALCAM	ADRBK1
EPB41L4A	ALG8	RNF125			ADAM8	ALDH16A1	ADRBK2
EPB41L4A-AS1	ALG9	RNF219			ADAM9	ALDH18A1	ADRM1
EPHA4	ALKBH1	RNFT1			ADAMTS6	ALDH1B1	ADSL
EPHX1	ALKBH2	RP11-204L24.2			ADAP2	ALDH1L2	ADSS
EPS8L2	ALKBH3	RP11-219B17.1			ADAR	ALDH3A2	ADTRP
ETV2	ALKBH4	RP11-242D8.1			ADAT1	ALDH5A1	AEBP2
EVI5	ALKBH5	RP11-284N8.3			ADAT2	ALDH6A1	AEN
EXD3	ALKBH6	RP11-305K5.1			ADAT3	ALDH9A1	AES
F2RL3	ALKBH8	RP11-313P13.5			ADCK1	ALDOC	AF127936.5
FAM114A1	ALMS1	RP11-319G6.1			ADCK3	ALG1	AFF1
FAM115C	ALOX5AP	RP11-381K20.2			ADCK4	ALG10	AFF4
FAM117A	ALS2	RP11-390F4.3			ADCK5	ALG11	AFG3L2
FAM127A	AMACR	RP11-435B5.4			ADCY3	ALG12	AFMID
FAM134A	AMBRA1	RP11-445F6.2			ADCY7	ALG13	AFTPH
FAM134C	AMD1	RP11-488L18.10			ADD1	ALG14	AGA
FAM160B1	AMDHD2	RP11-488L18.8			ADH5	ALG2	AGAP2
FAM175A	AMFR	RP11-492E3.2			ADHFE1	ALG3	AGAP5
FAM179B	AMIGO2	RP11-598F7.3			ADI1	ALG6	AGAP8
FAM214B	AMMECR1	RP11-849H4.2			ADIPOR1	ALG8	AGBL3
FAM221A	AMMECR1L	RP5-1125A11.1			ADIPOR2	ALG9	AGBL5
FAM222B	AMN1	RPL13A			ADK	ALKBH1	AGER
FAM227B	AMPD1	RPL27A			ADM	ALKBH2	AGFG1
FAM63A	AMPD2	RRAGC			ADM2	ALKBH3	AGFG2
FBXL17	AMY2B	RRM2B			ADNP	ALKBH4	AGGF1
FBXL8	AMZ2	RTN4IP1			ADNP2	ALKBH5	AGK
FBXO25	ANAPC1	RYBP			ADO	ALKBH6	AGL
FBXO3	ANAPC10	SCRN1			ADORA2A	ALKBH8	AGMAT
FBXO32	ANAPC13	SDCBP2-AS1			ADPGK	ALMS1	AGO1
FBXO44	ANAPC2	SEPSECS			ADPGK-AS1	ALOX5AP	AGO2
FBXO48	ANAPC4	SFXN5			ADPRH	ALS2	AGO3
FBXW8	ANAPC7	SH3RF1			ADPRHL1	AMBRA1	AGO4
FBXW9	ANG	SIAH2			ADPRHL2	AMD1	AGPAT1
FCGRT	ANGEL1	SIRT5			ADPRM	AMDHD2	AGPAT2
FECH	ANGEL2	SLC15A2			ADRB2	AMFR	AGPAT3
FEM1B	ANKAR	SLC26A2			ADRBK1	AMMECR1	AGPAT4
FGD3	ANKDD1A	SLC39A3			ADRBK2	AMPD2	AGPAT5
FGD5-AS1	ANKEF1	SLFN12			ADSL	AMZ2	AGPAT6
FGGY	ANKFY1	SLFN5			ADSS	ANAPC1	AGPS
FHIT	ANKHD1	SLK			AE000662.93	ANAPC10	AGTPBP1
FIG4	ANKIB1	SMAD4			AEBP2	ANAPC13	AGTRAP
FOXK2	ANKLE2	SNORD3B-1			AEN	ANAPC15	AHCTF1
FOXO1	ANKMY1	SORBS2			AF127936.5	ANAPC16	AHCY
FRG1B	ANKMY2	SPAG16			AF196972.9	ANAPC2	AHCYL1
FTO	ANKRA2	SRGAP2			AFF1	ANAPC4	AHCYL2
GAB2	ANKRD11	SRP14-AS1			AFF4	ANAPC7	AHI1
GALNS	ANKRD13A	SSBP3			AFG3L2	ANG	AHNAK
GALNT3	ANKRD13C	STAT6			AFMID	ANGEL1	AHR
GALNT6	ANKRD13D	SULF2			AFTPH	ANGEL2	AHSA1
GCSAM	ANKRD16	SULT1A1			AGA	ANKEF1	AHSA2
GDAP2	ANKRD17	SUOX			AGAP10	ANKFY1	AIDA
GEN1	ANKRD26	SUV420H1			AGAP2	ANKHD1	AIFM1
GGACT	ANKRD27	SYNJ2BP			AGAP2-AS1	ANKIB1	AIFM2
GGT1	ANKRD32	TAF10			AGAP5	ANKLE2	AIG1
GLTSCR2	ANKRD36	TAX1BP3			AGAP6	ANKMY1	AIM1
GNG2	ANKRD36C	TBC1D31			AGAP8	ANKMY2	AIM2
GNG3	ANKRD37	TCEAL3			AGBL3	ANKRA2	AIMP1
GPR155	ANKRD39	TCEANC2			AGBL5	ANKRD10	AIMP2
GPR55	ANKRD40	TCTN1			AGER	ANKRD11	AIP
GPR89A	ANKRD44	TET2			AGFG1	ANKRD13A	AK2
GRAMD1A	ANKRD46	TEX2			AGFG2	ANKRD13C	AK3
GRAMD1C	ANKRD49	TGFBRAP1			AGGF1	ANKRD13D	AK9
GRINA	ANKRD54	TGIF2			AGK	ANKRD17	AKAP1
GS1-124K5.4	ANKS3	THAP11			AGL	ANKRD26	AKAP10
GSN	ANKZF1	THTPA			AGMAT	ANKRD27	AKAP11
GSPT1	ANO10	TLE1			AGO1	ANKRD28	AKAP13
GTF2E1	ANO6	TMEM168			AGO2	ANKRD32	AKAP17A
HACE1	ANTXR2	TMEM216			AGO3	ANKRD36	AKAP2
HCG11	ANXA2R	TMEM245			AGO4	ANKRD36C	AKAP8
HDAC10	ANXA3	TMEM251			AGPAT1	ANKRD37	AKAP8L
HDAC5	ANXA4	TOM1L2			AGPAT2	ANKRD39	AKAP9
HERC5	AP000476.1	TP53RK			AGPAT3	ANKRD44	AKIP1
HINFP	AP000769.1	TPCN1			AGPAT5	ANKRD46	AKIRIN1
HIPK3	AP001046.5	TRAPPC2P1			AGPAT6	ANKRD49	AKIRIN2
HIST2H2AC	AP001055.6	TREML2			AGPS	ANKRD52	AKNA
HIVEP2	AP001056.1	TRIM24			AGTPBP1	ANKRD54	AKR1B1
HKR1	AP001058.3	TRIM33			AGTRAP	ANKS3	AKR7A2
HLA-DOB	AP001258.4	TRIM61			AHCTF1	ANKZF1	AKT1
HLA-G	AP001372.2	TSNAX			AHCY	ANO10	AKT1S1
HMOX1	AP001816.1	TSTD3			AHCYL1	ANO6	AKT2
HNRNPA0	AP003774.1	TTN-AS1			AHCYL2	ANO9	AKTIP
HNRNPA1L2	AP006222.2	TTPAL			AHI1	ANP32A	AL109761.5
HNRNPAB	AP1AR	TTTY15			AHR	ANP32B	AL122127.25
HNRNPD	AP1B1	TUBD1			AHSA1	ANP32E	AL139099.1
HOMER3	AP1G1	UBOX5			AHSA2	ANTXR2	AL441883.1
HOOK1	AP1G2	UFSP1			AIDA	ANXA1	AL591479.1
HOOK2	AP1S1	UNKL			AIFM1	ANXA11	AL592183.1
HOTAIRM1	AP1S2	USP30			AIFM2	ANXA2R	AL645728.1
HOXB7	AP1S3	USP53			AIG1	ANXA4	AL928768.3
HPCAL1	AP2A1	USP6NL			AIM2	ANXA7	ALAD
HPS4	AP2A2	UTY			AIMP1	AP000769.1	ALAS1
HRK	AP2B1	VPS8			AIMP2	AP001046.5	ALCAM
HSPA1B	AP3M1	VSIG10			AIP	AP001055.6	ALDH16A1
HSPH1	AP3M2	WDPCP			AK2	AP001056.1	ALDH18A1
ICAM4	AP3S2	WDR44			AK3	AP001058.3	ALDH1B1
ICK	AP4B1	WDR89			AK9	AP001258.4	ALDH1L2
IDNK	AP4M1	WHAMM			AKAP1	AP001816.1	ALDH3A2
IFI27	AP4S1	WWC3			AKAP10	AP1AR	ALDH4A1
IFI6	AP5M1	YAE1D1			AKAP11	AP1B1	ALDH5A1
IFIT5	AP5S1	ZBTB33			AKAP13	AP1G1	ALDH6A1
IFITM1	AP5Z1	ZBTB45			AKAP17A	AP1G2	ALDH7A1
IFRD1	APAF1	ZC2HC1A			AKAP2	AP1M1	ALDH9A1
IFT43	APBA3	ZDBF2			AKAP8	AP1S1	ALDOC
IFT80	APBB1IP	ZFP14			AKAP8L	AP1S2	ALG1
IKZF5	APBB3	ZFYVE1			AKIP1	AP2A1	ALG10
INADL	APC	ZFYVE26			AKIRIN1	AP2A2	ALG10B
ING4	APEX1	ZKSCAN4			AKIRIN2	AP2B1	ALG11
INPP1	APEX2	ZMYM6			AKNA	AP2M1	ALG12
INPP4A	APH1B	ZNF101			AKR1B1	AP2S1	ALG13
INSR	API5	ZNF117			AKR7A2	AP3B1	ALG14
IRAK2	APIP	ZNF140			AKT1	AP3D1	ALG2
IRF2BP2	APITD1	ZNF16			AKT1S1	AP3M1	ALG3
ISG15	APLF	ZNF160			AKT2	AP3M2	ALG5
ITGA6	APOBEC3D	ZNF182			AKT3	AP3S1	ALG6
IZUMO4	APOBEC3F	ZNF189			AKTIP	AP3S2	ALG8
JRKL	APOBEC3H	ZNF212			AL022341.3	AP4B1	ALG9
JUP	APOBR	ZNF250			AL109761.5	AP4M1	ALKBH1
KAT2B	APOL1	ZNF28			AL122127.25	AP4S1	ALKBH2
KB-1980E6.3	APOL2	ZNF322			AL139099.1	AP5M1	ALKBH3
KBTBD3	APOL3	ZNF324			AL354822.1	AP5S1	ALKBH4
KBTBD7	APOL6	ZNF383			AL590822.2	AP5Z1	ALKBH5
KCNK12	APOLD1	ZNF397			AL591479.1	APAF1	ALKBH6
KCNMA1	APOM	ZNF398			AL645728.1	APBA3	ALKBH8
KCTD7	APOO	ZNF41			AL807752.1	APBB1IP	ALMS1
KDM3A	APOOL	ZNF420			AL928768.3	APBB3	ALOX15
KDM4B	APOPT1	ZNF480			ALAD	APC	ALOX5
KHDRBS1	APPBP2	ZNF486			ALAS1	APEH	ALOX5AP
KIAA0247	APPL1	ZNF510			ALCAM	APEX1	ALPK1
KIAA0430	APPL2	ZNF526			ALDH16A1	APEX2	ALS2
KIAA0753	APTX	ZNF585B			ALDH18A1	APH1A	ALYREF
KIAA1430	AQR	ZNF587			ALDH1B1	APH1B	AMACR
KIAA1919	ARAF	ZNF609			ALDH1L2	API5	AMBRA1
KIAA2026	ARAP1	ZNF611			ALDH2	APIP	AMD1
KIF1B	AREL1	ZNF627			ALDH3A2	APITD1	AMDHD2
KIF2A	ARF3	ZNF646			ALDH4A1	APLF	AMER1
KIF9	ARF6	ZNF671			ALDH5A1	APLP2	AMFR
KLC4	ARFGAP1	ZNF675			ALDH6A1	APMAP	AMMECR1
KLF7	ARFGAP2	ZNF708			ALDH7A1	APOA1BP	AMMECR1L
KLHL21	ARFGEF1	ZNF738			ALDH9A1	APOBEC3B	AMN1
KLHL24	ARFGEF2	ZNF780A			ALDOC	APOBEC3D	AMOTL1
KLHL28	ARFIP1	ZNF780B			ALG1	APOBEC3F	AMPD2
KLHL5	ARFIP2	ZNF790			ALG10	APOBEC3H	AMPD3
KMT2E-AS1	ARFRP1	ZNF816			ALG10B	APOL1	AMY2B
KRBOX4	ARHGAP1	ZNF846			ALG11	APOL2	AMZ2
KRIT1	ARHGAP11B	ZRANB1			ALG12	APOL3	ANAPC1
KTI12	ARHGAP12	ZSCAN21			ALG13	APOL6	ANAPC10
LACTB	ARHGAP15	ZSCAN9			ALG14	APOM	ANAPC11
LAMP1	ARHGAP18	ZSWIM6			ALG1L	APOO	ANAPC13
LCLAT1	ARHGAP19	ZSWIM8			ALG2	APOOL	ANAPC15
LCN8	ARHGAP21	ZUFSP			ALG3	APOPT1	ANAPC16
LIMD1	ARHGAP24				ALG5	APPBP2	ANAPC2
LINC00094	ARHGAP25				ALG6	APPL1	ANAPC4
LINC00324	ARHGAP27				ALG8	APPL2	ANAPC5
LINC00422	ARHGAP31				ALG9	APTX	ANAPC7
LINC00426	ARHGAP42				ALKBH1	AQR	ANG
LINC00528	ARHGAP5				ALKBH2	ARAF	ANGEL1
LINC00662	ARHGAP6				ALKBH3	ARAP1	ANGEL2
LINC00847	ARHGAP9				ALKBH4	ARCN1	ANKAR
LINC00938	ARHGEF12				ALKBH5	ARF3	ANKDD1A
LINC00944	ARHGEF18				ALKBH6	ARF5	ANKEF1
LINC01023	ARHGEF19				ALKBH8	ARF6	ANKFY1
LL22NC03-2H8.5	ARHGEF2				ALMS1	ARFGAP1	ANKH
LLGL2	ARHGEF3				ALOX15	ARFGAP2	ANKHD1
LMF1	ARHGEF39				ALOX5	ARFGEF1	ANKIB1
LOXL2	ARHGEF6				ALOX5AP	ARFGEF2	ANKLE2
LPAR2	ARHGEF7				ALPK1	ARFIP1	ANKMY2
LPP	ARHGEF9				ALS2	ARFIP2	ANKRA2
LRRC16A	ARID1B				ALYREF	ARFRP1	ANKRD10
LRRC23	ARID2				AMACR	ARG2	ANKRD11
LRRC29	ARID3A				AMBRA1	ARGLU1	ANKRD12
LRRC57	ARID3B				AMD1	ARHGAP1	ANKRD13A
LRSAM1	ARID4A				AMDHD1	ARHGAP11A	ANKRD13C
LRTOMT	ARID4B				AMDHD2	ARHGAP11B	ANKRD13D
LTBP4	ARID5A				AMER1	ARHGAP12	ANKRD16
LTK	ARID5B				AMFR	ARHGAP15	ANKRD17
LY75	ARIH2OS				AMIGO2	ARHGAP18	ANKRD26
LY96	ARL11				AMMECR1	ARHGAP21	ANKRD27
MANEA-AS1	ARL13B				AMMECR1L	ARHGAP25	ANKRD28
MAP10	ARL14EP				AMN	ARHGAP27	ANKRD32
MAP2K5	ARL15				AMN1	ARHGAP30	ANKRD36
MAP2K6	ARL16				AMPD1	ARHGAP4	ANKRD36C
MAP3K14-AS1	ARL17A				AMPD2	ARHGAP5	ANKRD37
MAPK13	ARL2				AMPD3	ARHGAP9	ANKRD39
MAPK14	ARL2BP				AMT	ARHGEF1	ANKRD40
MARC2	ARL3				AMY2B	ARHGEF18	ANKRD42
MARCH8	ARL4A				AMZ2	ARHGEF19	ANKRD44
MARK4	ARL4C				ANAPC1	ARHGEF2	ANKRD46
MB21D1	ARL5B				ANAPC10	ARHGEF3	ANKRD49
MB21D2	ARL6IP1				ANAPC13	ARHGEF6	ANKRD52
MBP	ARL6IP6				ANAPC15	ARHGEF7	ANKRD54
MDFIC	ARL8A				ANAPC2	ARHGEF9	ANKS1A
MDK	ARL8B				ANAPC4	ARID1A	ANKS3
MED13	ARMC1				ANAPC7	ARID1B	ANKZF1
MED9	ARMC10				ANG	ARID2	ANLN
MEF2C-AS1	ARMC2				ANGEL1	ARID3A	ANO10
METTL14	ARMC5				ANGEL2	ARID3B	ANO6
MEX3C	ARMC6				ANKAR	ARID4A	ANO9
MFAP3	ARMC7				ANKDD1A	ARID4B	ANP32A
MFSD6	ARMC8				ANKEF1	ARID5A	ANP32E
MGAT4A	ARMCX2				ANKFY1	ARID5B	ANTXR2
MICA	ARMCX5				ANKH	ARIH1	ANXA2R
MIPEP	ARMCX6				ANKHD1	ARIH2	ANXA3
MIR142	ARNT				ANKHD1-EIF4EBP3	ARIH2OS	ANXA4
MIR22HG	ARNTL				ANKIB1	ARL1	ANXA7
MIR4519	ARPC1A				ANKLE1	ARL11	AOAH
MIS12	ARPC4				ANKLE2	ARL14EP	AP000476.1
MIXL1	ARPP19				ANKMY1	ARL16	AP000569.9
MOSPD1	ARRB2				ANKMY2	ARL2	AP000769.1
MOSPD2	ARRDC1				ANKRA2	ARL2BP	AP001055.6
MOSPD3	ARRDC3				ANKRD10	ARL3	AP001056.1
MSANTD3	ARSB				ANKRD11	ARL4A	AP001058.3
MT-ATP8	ARSG				ANKRD13A	ARL4C	AP001258.4
MT-ND1	ARSK				ANKRD13C	ARL5A	AP001610.5
MT-ND2	ARV1				ANKRD13D	ARL5B	AP001816.1
MT-ND3	ASAP1				ANKRD16	ARL6IP1	AP003419.16
MT-ND4L	ASB1				ANKRD17	ARL6IP5	AP003774.1
MT-ND5	ASB16-AS1				ANKRD23	ARL6IP6	AP006222.2
MTA3	ASB2				ANKRD24	ARL8A	AP1AR
MTERF	ASB6				ANKRD26	ARL8B	AP1B1
MTHFSD	ASB7				ANKRD27	ARMC1	AP1G1
MTM1	ASB8				ANKRD28	ARMC2	AP1G2
MTMR10	ASCC1				ANKRD32	ARMC5	AP1M1
MTMR4	ASCC2				ANKRD36	ARMC6	AP1S1
MTSS1	ASCC3				ANKRD36C	ARMC7	AP1S2
MXD1	ASF1A				ANKRD37	ARMC8	AP1S3
MXD4	ASH1L				ANKRD39	ARMCX3	AP2A1
MYBL2	ASH2L				ANKRD40	ARMCX5	AP2A2
MYNN	ASL				ANKRD42	ARMCX6	AP2B1
MYO1C	ASMTL				ANKRD44	ARNT	AP2M1
MYO1D	ASNS				ANKRD46	ARPC1A	AP2S1
MYO5A	ASNSD1				ANKRD49	ARPC1B	AP3B1
NABP1	ASPH				ANKRD52	ARPC4	AP3D1
NASP	ASPHD2				ANKRD54	ARPC5L	AP3M1
NAT6	ASPSCR1				ANKRD65	ARPP19	AP3M2
NBPF15	ASTE1				ANKS1A	ARRB2	AP3S1
NCOA1	ASTN2				ANKS3	ARRDC1	AP3S2
NCOA7	ASUN				ANKZF1	ARRDC3	AP4B1
NDRG1	ASXL1				ANLN	ARSA	AP4E1
NEDD4L	ASXL2				ANO10	ARSB	AP4M1
NEIL1	ATAD1				ANO6	ARSD	AP4S1
NEK8	ATAD2B				ANTXR2	ARSG	AP5M1
NFAT5	ATAD3B				ANXA11	ARSK	AP5S1
NHLRC4	ATAD3C				ANXA2R	ARV1	AP5Z1
NIFK-AS1	ATAT1				ANXA4	ASAH1	APAF1
NISCH	ATE1				ANXA7	ASB1	APBA3
NKIRAS1	ATF1				AOAH	ASB16-AS1	APBB1IP
NOMO3	ATF2				AP000442.1	ASB2	APBB3
NOP56	ATF6				AP000476.1	ASB6	APC
NPAT	ATF7				AP000569.9	ASB7	APEH
NPHP3	ATF7IP				AP000769.1	ASB8	APEX1
NPIPA1	ATF7IP2				AP001046.5	ASCC1	APEX2
NPIPB15	ATG10				AP001055.6	ASCC2	APH1A
NPIPB4	ATG12				AP001056.1	ASCC3	APH1B
NPLOC4	ATG13				AP001058.3	ASF1A	API5
NR2C1	ATG14				AP001258.4	ASF1B	APIP
NSUN3	ATG16L1				AP001347.6	ASH1L	APITD1
NSUN4	ATG16L2				AP001412.1	ASH2L	APLF
NT5C3B	ATG2A				AP001610.5	ASL	APLP2
NT5E	ATG2B				AP001816.1	ASMTL	APMAP
NUB1	ATG4A				AP003419.16	ASNA1	APOA1BP
NUDT14	ATG4B				AP003774.1	ASNS	APOBEC3B
OARD1	ATG4C				AP006222.2	ASNSD1	APOBEC3C
OCEL1	ATG7				AP006621.5	ASPH	APOBEC3D
ODF3B	ATG9A				AP1AR	ASPSCR1	APOBEC3F
ORAI3	ATHL1				AP1B1	ASRGL1	APOBEC3G
OSBPL2	ATIC				AP1G1	ASTE1	APOBEC3H
OSBPL3	ATL1				AP1G2	ASTN2	APOBR
OSER1-AS1	ATL2				AP1M1	ASUN	APOL1
P2RX4	ATL3				AP1S1	ASXL1	APOL2
P4HA1	ATM				AP1S2	ASXL2	APOL3
P4HTM	ATMIN				AP1S3	ATAD1	APOL6
PABPC1L	ATP10D				AP2A1	ATAD2B	APOLD1
PAOX	ATP11A				AP2A2	ATAD3A	APOM
PAPOLG	ATP11B				AP2B1	ATAD3B	APOO
PAQR6	ATP11C				AP2S1	ATAD3C	APOOL
PARD6B	ATP13A1				AP3B1	ATAT1	APOPT1
PARP16	ATP13A3				AP3D1	ATE1	APP
PARP3	ATP1A1				AP3M1	ATF1	APPBP2
PASK	ATP1B1				AP3M2	ATF2	APPL1
PCAT6	ATP2A2				AP3S1	ATF6	APPL2
PCED1A	ATP2A3				AP3S2	ATF6B	APTX
PCMTD2	ATP2B1				AP4B1	ATF7	AQR
PCTP	ATP2B4				AP4E1	ATF7IP	ARAF
PDCD4-AS1	ATP2C1				AP4M1	ATF7IP2	ARAP1
PDE4A	ATP5S				AP4S1	ATG10	ARAP2
PDE4D	ATP5SL				AP5B1	ATG12	ARCN1
PDIK1L	ATP6V0A1				AP5M1	ATG13	AREL1
PGAP3	ATP6V0E2				AP5S1	ATG14	ARF3
PGBD2	ATP6V1A				AP5Z1	ATG16L2	ARF6
PGLYRP2	ATP6V1B2				APAF1	ATG2A	ARFGAP1
PGM2L1	ATP6V1C1				APBA3	ATG2B	ARFGAP2
PHF7	ATP6V1C2				APBB1IP	ATG3	ARFGAP3
PHYHD1	ATP6V1D				APBB3	ATG4A	ARFGEF1
PIBF1	ATP6V1E1				APC	ATG4B	ARFGEF2
PLCD1	ATP6V1E2				APEH	ATG4C	ARFIP1
PLD6	ATP6V1H				APEX1	ATG5	ARFIP2
PLEKHF2	ATP7A				APEX2	ATG7	ARFRP1
PLEKHM1	ATP8A1				APH1B	ATG9A	ARG2
PLEKHN1	ATP8B2				API5	ATHL1	ARGLU1
PLTP	ATP9B				APIP	ATIC	ARHGAP1
PLXNC1	ATPAF1				APITD1	ATL2	ARHGAP11A
PMAIP1	ATPAF2				APLF	ATL3	ARHGAP11B
PMEPA1	ATR				APLP2	ATM	ARHGAP12
PPAP2A	ATRN				APMAP	ATMIN	ARHGAP15
PPARA	ATXN1				APOA1BP	ATP10D	ARHGAP18
PPIL4	ATXN1L				APOBEC3D	ATP11A	ARHGAP19
PPM1M	ATXN2				APOBEC3F	ATP11B	ARHGAP21
PPP1R35	ATXN3				APOBEC3H	ATP11C	ARHGAP24
PPP4R1	ATXN7				APOBR	ATP13A1	ARHGAP25
PQLC2	ATXN7L1				APOL1	ATP13A3	ARHGAP26
PRDM8	ATXN7L3				APOL2	ATP1A1	ARHGAP27
PRKAB2	ATXN7L3B				APOL3	ATP1B3	ARHGAP30
PRKAR1B	AUH				APOL6	ATP2A2	ARHGAP31
PRKCD	AURKA				APOLD1	ATP2A3	ARHGAP33
PRNP	AVEN				APOM	ATP2B1	ARHGAP35
PRR4	AVL9				APOO	ATP2B4	ARHGAP4
PSEN2	AZI1				APOOL	ATP2C1	ARHGAP42
PSMG3-AS1	AZI2				APOPT1	ATP5D	ARHGAP5
PTCHD3P1	AZIN1				APP	ATP5S	ARHGAP6
PTPN23	B3GALNT2				APPBP2	ATP5SL	ARHGAP9
PTPRN2	B3GALT4				APPL1	ATP6AP1	ARHGDIA
PTPRO	B3GNT1				APPL2	ATP6V0A1	ARHGEF1
PTRH1	B3GNTL1				APTX	ATP6V0A2	ARHGEF12
PURA	B4GALT2				AQP11	ATP6V0C	ARHGEF18
PURB	B4GALT4				AQR	ATP6V0D1	ARHGEF19
PYROXD1	B4GALT7				ARAF	ATP6V0E2	ARHGEF2
QSOX1	B9D2				ARAP1	ATP6V1A	ARHGEF3
R3HCC1L	BABAM1				ARCN1	ATP6V1B2	ARHGEF35
RAB2B	BACE2				AREG	ATP6V1C1	ARHGEF39
RAB31	BACH1				AREL1	ATP6V1C2	ARHGEF5
RAB33A	BACH2				ARF3	ATP6V1D	ARHGEF6
RAB33B	BAD				ARF5	ATP6V1E1	ARHGEF7
RAB37	BAG2				ARF6	ATP6V1E2	ARHGEF9
RAB3D	BAG4				ARFGAP1	ATP6V1H	ARID1A
RALB	BAG5				ARFGAP2	ATP7A	ARID1B
RALGAPA1	BANK1				ARFGEF1	ATP8A1	ARID2
RANBP1	BANP				ARFGEF2	ATP8B2	ARID3A
RANBP10	BAP1				ARFIP1	ATP9B	ARID3B
RAPGEF1	BARD1				ARFIP2	ATPAF1	ARID4A
RARS2	BASP1				ARFRP1	ATPAF2	ARID4B
RASGRP1	BATF				ARG2	ATR	ARID5A
RBKS	BAX				ARHGAP1	ATXN1	ARID5B
RBM34	BAZ1A				ARHGAP11A	ATXN10	ARIH1
RBM41	BAZ1B				ARHGAP11B	ATXN1L	ARIH2
RBM4B	BAZ2B				ARHGAP12	ATXN2	ARIH2OS
RC3H1	BBIP1				ARHGAP15	ATXN2L	ARL1
RCHY1	BBS10				ARHGAP18	ATXN3	ARL11
RDH13	BBS2				ARHGAP19	ATXN7	ARL13B
RELB	BBS4				ARHGAP21	ATXN7L1	ARL14EP
RFX3	BBS7				ARHGAP25	ATXN7L3B	ARL15
RGS14	BBS9				ARHGAP27	AUH	ARL16
RICTOR	BBX				ARHGAP30	AURKA	ARL17A
RIN3	BCAP29				ARHGAP31	AVL9	ARL2BP
RIPK3	BCAS2				ARHGAP33	AZI2	ARL3
RNASEL	BCAS3				ARHGAP35	AZIN1	ARL4A
RNF122	BCAS4				ARHGAP4	B3GALNT2	ARL4C
RNF125	BCAT2				ARHGAP42	B3GALT4	ARL5A
RNF135	BCDIN3D				ARHGAP5	B3GAT3	ARL5B
RNF146	BCKDHA				ARHGAP9	B3GNT1	ARL6IP1
RNF170	BCKDHB				ARHGEF1	B3GNT2	ARL6IP5
RNF220	BCL10				ARHGEF12	B4GALT2	ARL6IP6
ROCK2	BCL11A				ARHGEF18	B4GALT4	ARL8A
RP1-101K10.6	BCL2				ARHGEF19	B4GALT7	ARL8B
RP1-148H17.1	BCL2A1				ARHGEF2	B9D1	ARMC1
RP1-28O10.1	BCL2L1				ARHGEF3	B9D2	ARMC10
RP11-103G8.2	BCL2L11				ARHGEF35	BABAM1	ARMC2
RP11-108K14.8	BCL2L12				ARHGEF39	BACH1	ARMC5
RP11-110G21.1	BCL2L13				ARHGEF5	BAD	ARMC6
RP11-111F5.4	BCL7B				ARHGEF6	BAG1	ARMC7
RP11-111M22.2	BCL9				ARHGEF7	BAG2	ARMC8
RP11-166P13.3	BCOR				ARHGEF9	BAG4	ARMCX2
RP11-182L21.6	BCS1L				ARID1A	BAG5	ARMCX3
RP11-204L24.2	BDH1				ARID1B	BAG6	ARMCX5
RP11-206L10.2	BDH2				ARID2	BAK1	ARMCX6
RP11-258F1.1	BDP1				ARID3A	BANF1	ARNT
RP11-262H14.4	BET1				ARID3B	BANK1	ARNTL
RP11-275I4.2	BEX2				ARID4A	BANP	ARNTL2
RP11-284F21.7	BEX4				ARID4B	BAP1	ARPC1A
RP11-284N8.3	BEX5				ARID5A	BARD1	ARPC1B
RP11-290F5.2	BFAR				ARID5B	BASP1	ARPC4
RP11-299J3.8	BFSP2				ARIH1	BATF	ARPC4-TTLL3
RP11-304L19.5	BHLHA15				ARIH2	BAX	ARPC5
RP11-319G6.1	BHLHE41				ARIH2OS	BAZ1A	ARPC5L
RP11-337C18.8	BICD1				ARL1	BAZ1B	ARPP19
RP11-356I2.4	BICD2				ARL10	BAZ2A	ARRB2
RP11-37B2.1	BIK				ARL11	BAZ2B	ARRDC1
RP11-380I10.4	BIN1				ARL13B	BBIP1	ARRDC3
RP11-383H13.1	BIN3				ARL14EP	BBS2	ARRDC5
RP11-390F4.3	BIRC2				ARL15	BBS7	ARSA
RP11-390F4.6	BIRC3				ARL16	BBS9	ARSB
RP11-445F6.2	BIRC6				ARL17A	BBX	ARSG
RP11-455F5.5	BIVM				ARL2	BCAP29	ARSK
RP11-464F9.20	BLCAP				ARL2BP	BCAS2	ARV1
RP11-473M20.14	BLK				ARL3	BCAS3	ASAH1
RP11-473M20.7	BLM				ARL4A	BCAS4	ASAP1
RP11-480C16.1	BLMH				ARL4D	BCAT2	ASB1
RP11-492E3.2	BLOC1S2				ARL5A	BCCIP	ASB16-AS1
RP11-493L12.4	BLOC1S4				ARL5B	BCDIN3D	ASB2
RP11-51J9.5	BLOC1S5				ARL5B-AS1	BCKDHA	ASB6
RP11-553L6.5	BLOC1S6				ARL6	BCKDHB	ASB7
RP11-554J4.1	BLVRA				ARL6IP1	BCKDK	ASB8
RP11-588H23.3	BLVRB				ARL6IP5	BCL10	ASCC1
RP11-598F7.3	BLZF1				ARL6IP6	BCL11A	ASCC2
RP11-611E13.2	BMF				ARL8A	BCL2	ASCC3
RP11-809O17.1	BMI1				ARL8B	BCL2A1	ASF1A
RP11-875O11.1	BMP2K				ARMC1	BCL2L1	ASF1B
RP11-96H19.1	BMP8B				ARMC10	BCL2L11	ASH1L
RP13-1032I1.7	BMPR2				ARMC2	BCL2L12	ASH2L
RP13-188A5.1	BMS1				ARMC5	BCL2L13	ASL
RP3-323P24.3	BNIP1				ARMC6	BCL7A	ASMTL
RP4-728D4.2	BNIP3				ARMC7	BCL7B	ASMTL-AS1
RP5-1068E13.7	BNIP3L				ARMC8	BCOR	ASNA1
RP5-1091N2.9	BOD1L1				ARMC9	BCS1L	ASNS
RP5-1103G7.4	BOLA1				ARMCX2	BDH1	ASNSD1
RP5-827C21.4	BOLA2B				ARMCX3	BDH2	ASPH
RP5-886K2.3	BORA				ARMCX4	BDP1	ASPHD2
RP6-109B7.3	BPGM				ARMCX5	BECN1	ASPM
RPL13A	BPHL				ARMCX6	BET1	ASPSCR1
RPL23A	BPNT1				ARNT	BET1L	ASRGL1
RPL27A	BPTF				ARNTL	BEX2	ASTE1
RPS11	BRAF				ARNTL2	BEX4	ASTN2
RPS2	BRAP				ARPC1A	BEX5	ASUN
RPS20	BRAT1				ARPC4	BFAR	ASXL1
RPS27	BRCA2				ARPC4-TTLL3	BFSP2	ASXL2
RPS29	BRCC3				ARPC5L	BHLHA15	ATAD1
RPS6KA5	BRD3				ARPP19	BHLHE41	ATAD2
RPSAP58	BRD4				ARRB2	BICD1	ATAD2B
RPUSD2	BRD7				ARRDC1	BICD2	ATAD3A
RRM2B	BRD8				ARRDC2	BID	ATAD3B
RUFY2	BRD9				ARRDC3	BIK	ATAD3C
RUNX2	BRE				ARRDC5	BIN1	ATAD5
RWDD2A	BRF2				ARSB	BIN2	ATAT1
RYBP	BRI3				ARSD	BIN3	ATE1
S100A13	BRI3BP				ARSG	BIRC2	ATF1
S1PR4	BRIP1				ARSK	BIRC3	ATF2
SAE1	BRIX1				ARV1	BIRC5	ATF4
SAMD12	BRMS1				ASAH1	BIRC6	ATF5
SCAF8	BRMS1L				ASAP1	BLCAP	ATF6
SCAMP5	BROX				ASB1	BLK	ATF6B
SCAPER	BRPF1				ASB16-AS1	BLM	ATF7
SCCPDH	BRPF3				ASB2	BLMH	ATF7IP
SCN3A	BRWD1				ASB6	BLOC1S1	ATF7IP2
SCNN1B	BRWD3				ASB7	BLOC1S2	ATG10
SCYL2	BSCL2				ASB8	BLOC1S6	ATG12
SCYL3	BSDC1				ASCC1	BLVRA	ATG13
SDCBP	BTBD1				ASCC2	BLVRB	ATG14
SDHAF1	BTBD10				ASCC3	BLZF1	ATG16L1
SDHAF2	BTBD7				ASF1A	BMI1	ATG16L2
SEC24B	BTBD9				ASF1B	BMP8B	ATG2A
SELL	BTD				ASH1L	BMS1	ATG2B
SENP7	BTF3L4				ASH2L	BNIP1	ATG3
SERPINF1	BTG3				ASL	BNIP2	ATG4A
SERPINF2	BTLA				ASMT	BNIP3	ATG4B
SERTAD1	BTN1A1				ASMTL	BNIP3L	ATG4C
SESN1	BTN2A1				ASMTL-AS1	BOD1L1	ATG4D
SESN2	BTN2A2				ASNA1	BOLA1	ATG5
SFPQ	BTN3A1				ASNS	BOLA2B	ATG7
SGCB	BTN3A2				ASNSD1	BOLA3	ATG9A
SH2D3C	BTN3A3				ASPH	BPGM	ATHL1
SH3BP5-AS1	BTRC				ASPHD2	BPHL	ATIC
SH3RF1	BUD13				ASPSCR1	BPNT1	ATL1
SHPRH	BYSL				ASRGL1	BPTF	ATL2
SIGIRR	BZW2				ASTE1	BRAF	ATL3
SKAP1	C10orf118				ASTN2	BRAP	ATM
SLC12A9	C10orf128				ASUN	BRAT1	ATMIN
SLC15A2	C10orf32				ASXL1	BRCA2	ATN1
SLC16A1-AS1	C10orf76				ASXL2	BRCC3	ATOX1
SLC16A3	C10orf88				ATAD1	BRD2	ATP10D
SLC22A18	C11orf1				ATAD2B	BRD4	ATP11A
SLC22A5	C11orf30				ATAD3A	BRD7	ATP11B
SLC25A14	C11orf49				ATAD3B	BRD8	ATP11C
SLC25A45	C11orf54				ATAD3C	BRD9	ATP13A1
SLC26A2	C11orf57				ATAD5	BRE	ATP13A2
SLC27A5	C11orf63				ATAT1	BRF2	ATP13A3
SLC2A3	C11orf71				ATE1	BRI3BP	ATP1A1
SLC31A2	C11orf73				ATF1	BRIX1	ATP1B1
SLC35A3	C11orf80				ATF2	BRK1	ATP1B3
SLC35E2	C11orf82				ATF6	BRMS1	ATP2A2
SLC35E2B	C11orf83				ATF6B	BRMS1L	ATP2A3
SLC35F5	C12orf10				ATF7	BROX	ATP2B1
SLC38A9	C12orf23				ATF7IP	BRSK1	ATP2B4
SLC39A3	C12orf29				ATF7IP2	BRWD1	ATP2C1
SLC41A2	C12orf4				ATG10	BRWD3	ATP5D
SLC46A3	C12orf42				ATG12	BSCL2	ATP5G1
SLC48A1	C12orf43				ATG13	BSDC1	ATP5H
SLC4A8	C12orf49				ATG14	BTAF1	ATP5S
SLC6A9	C12orf5				ATG16L1	BTBD1	ATP5SL
SLFN11	C12orf55				ATG16L2	BTBD10	ATP6AP1
SLFN12	C12orf65				ATG2A	BTBD7	ATP6AP2
SMAGP	C12orf66				ATG2B	BTD	ATP6V0A1
SMC3	C12orf73				ATG3	BTF3L4	ATP6V0A2
SMC4	C12orf74				ATG4A	BTG1	ATP6V0D1
SMIM1	C12orf76				ATG4B	BTG3	ATP6V0E1
SMIM14	C14orf1				ATG4C	BTK	ATP6V0E2
SMPD2	C14orf119				ATG4D	BTLA	ATP6V1A
SMYD5	C14orf142				ATG5	BTN2A1	ATP6V1B2
SNAI3	C14orf159				ATG7	BTN2A2	ATP6V1C1
SNAPC1	C14orf28				ATG9A	BTN3A1	ATP6V1C2
SNIP1	C14orf93				ATHL1	BTN3A2	ATP6V1D
SNORD3D	C15orf40				ATIC	BTN3A3	ATP6V1E1
SNX13	C15orf41				ATL1	BUB3	ATP6V1E2
SNX18	C15orf61				ATL2	BUD13	ATP6V1F
SNX29P2	C15orf65				ATL3	BUD31	ATP6V1H
SORBS2	C16orf59				ATM	BYSL	ATP7A
SOS1	C16orf62				ATMIN	BZW1	ATP7B
SOX4	C16orf70				ATN1	BZW2	ATP8A1
SPATA24	C16orf72				ATOX1	C10orf118	ATP8B2
SPIDR	C16orf74				ATP10D	C10orf2	ATP9B
SRC	C16orf80				ATP11A	C10orf32	ATPAF1
ST3GAL2	C16orf86				ATP11B	C10orf54	ATPAF2
STAU2	C16orf87				ATP11C	C10orf76	ATR
STOM	C16orf91				ATP13A1	C10orf88	ATRN
SULF2	C16orf93				ATP13A2	C11orf1	ATRX
SUOX	C16orf95				ATP13A3	C11orf24	ATXN1
SUPT16H	C17orf49				ATP1A1	C11orf30	ATXN10
SUZ12	C17orf51				ATP1A3	C11orf48	ATXN1L
SWT1	C17orf53				ATP1B1	C11orf49	ATXN2
SYNJ2BP	C17orf58				ATP1B3	C11orf54	ATXN2L
TAF13	C17orf59				ATP2A2	C11orf57	ATXN3
TBC1D12	C17orf70				ATP2A3	C11orf63	ATXN7
TBC1D17	C17orf75				ATP2B1	C11orf65	ATXN7L1
TBC1D25	C17orf80				ATP2B4	C11orf71	ATXN7L2
TBC1D9	C17orf85				ATP2C1	C11orf73	ATXN7L3
TCEAL1	C17orf89				ATP5D	C11orf80	ATXN7L3B
TCEANC2	C18orf21				ATP5EP2	C11orf83	AUH
TCP11L1	C18orf25				ATP5S	C12orf10	AUNIP
TCP11L2	C18orf32				ATP5SL	C12orf23	AURKA
TCTN1	C18orf56				ATP6AP1	C12orf29	AURKAIP1
TECPR2	C19orf12				ATP6AP2	C12orf4	AURKB
TET2	C19orf24				ATP6V0A1	C12orf43	AVEN
TFDP2	C19orf25				ATP6V0A2	C12orf44	AVL9
TFE3	C19orf38				ATP6V0B	C12orf45	AXIN1
TFEB	C19orf52				ATP6V0C	C12orf5	AZI1
THAP6	C19orf54				ATP6V0D1	C12orf65	AZI2
TIMP2	C19orf55				ATP6V0E2	C12orf66	AZIN1
TIPARP	C19orf66				ATP6V1A	C12orf73	B3GALNT2
TIRAP	C19orf82				ATP6V1B2	C12orf75	B3GALT4
TK2	C19orf83				ATP6V1C1	C12orf76	B3GAT3
TLE1	C1D				ATP6V1C2	C14orf1	B3GNT1
TLR1	C1GALT1				ATP6V1D	C14orf119	B3GNT2
TMBIM1	C1RL				ATP6V1E1	C14orf142	B3GNT9
TMCC1	C1RL-AS1				ATP6V1E2	C14orf159	B3GNTL1
TMCC1-AS1	C1orf109				ATP6V1H	C14orf28	B4GALT1
TMEM109	C1orf112				ATP7A	C14orf93	B4GALT2
TMEM117	C1orf122				ATP8A1	C15orf39	B4GALT4
TMEM140	C1orf123				ATP8B2	C15orf40	B4GALT7
TMEM14A	C1orf131				ATP8B3	C15orf41	B9D1
TMEM170A	C1orf167				ATP9A	C15orf61	B9D2
TMEM194A	C1orf174				ATP9B	C15orf65	BABAM1
TMEM220	C1orf186				ATPAF1	C16orf13	BACE2
TMEM254	C1orf216				ATPAF2	C16orf54	BACH1
TMEM42	C1orf27				ATR	C16orf58	BACH2
TMEM63A	C1orf35				ATRIP	C16orf59	BAD
TMEM63B	C1orf50				ATRN	C16orf62	BAG1
TMSB4X	C1orf52				ATXN1	C16orf70	BAG2
TNK2	C1orf53				ATXN10	C16orf74	BAG3
TOM1L2	C1orf54				ATXN1L	C16orf80	BAG4
TOR1AIP1	C1orf56				ATXN2	C16orf86	BAG5
TOR1AIP2	C1orf86				ATXN2L	C16orf87	BAG6
TP53I3	C20orf196				ATXN3	C16orf91	BAIAP3
TPGS1	C20orf27				ATXN7	C16orf93	BAK1
TPRG1	C20orf96				ATXN7L1	C16orf95	BANF1
TPT1-AS1	C21orf119				ATXN7L2	C16orf98	BANK1
TRAPPC2P1	C21orf2				ATXN7L3	C17orf49	BANP
TRIB3	C21orf49				ATXN7L3B	C17orf58	BAP1
TRIM32	C21orf59				AUH	C17orf59	BARD1
TRIM33	C21orf91				AUNIP	C17orf62	BASP1
TRIM69	C22orf29				AURKA	C17orf75	BATF
TRIM73	C22orf34				AURKB	C17orf80	BAX
TRIM8	C22orf39				AVEN	C17orf85	BAZ1A
TRIO	C22orf46				AVIL	C17orf89	BAZ1B
TRIT1	C2CD2				AVL9	C18orf21	BAZ2A
TSEN34	C2CD2L				AVPI1	C18orf25	BAZ2B
TSHZ2	C2CD3				AXIN1	C18orf32	BBC3
TSPAN17	C2CD5				AZI1	C18orf56	BBIP1
TSPAN31	C2orf42				AZI2	C18orf8	BBS2
TSTD2	C2orf43				AZIN1	C19orf12	BBS4
TTBK2	C2orf44				B2M	C19orf24	BBS7
TTC19	C2orf47				B3GALNT1	C19orf25	BBS9
TTC21A	C2orf49				B3GALNT2	C19orf38	BBX
TTC38	C2orf68				B3GALT4	C19orf43	BCAP29
TUBB	C2orf69				B3GALTL	C19orf48	BCAR3
TULP3	C2orf74				B3GAT2	C19orf52	BCAS2
TVP23C	C2orf76				B3GAT3	C19orf54	BCAS3
TXLNB	C3orf14				B3GNT1	C19orf60	BCAS4
TYMP	C3orf17				B3GNT2	C19orf66	BCAT1
TYW5	C3orf38				B3GNT9	C19orf68	BCAT2
UBA6-AS1	C3orf52				B3GNTL1	C19orf70	BCCIP
UBA7	C3orf58				B4GALT1	C19orf83	BCDIN3D
UBE2Q2	C4orf21				B4GALT2	C1D	BCKDHA
UBE2Z	C4orf27				B4GALT4	C1GALT1	BCKDHB
UBL3	C4orf29				B4GALT7	C1GALT1C1	BCKDK
UBN2	C4orf33				B9D1	C1QBP	BCL10
UBXN2A	C4orf36				B9D2	C1QTNF6	BCL11A
UBXN6	C4orf46				BABAM1	C1orf109	BCL2
UGDH-AS1	C4orf48				BACE2	C1orf112	BCL2A1
UGGT2	C5orf15				BACH1	C1orf122	BCL2L1
ULK1	C5orf22				BACH2	C1orf123	BCL2L11
UMODL1	C5orf24				BAD	C1orf131	BCL2L12
USP1	C5orf28				BAG1	C1orf167	BCL2L13
USP30-AS1	C5orf30				BAG2	C1orf174	BCL2L2
USP40	C5orf42				BAG3	C1orf186	BCL3
USP6NL	C5orf45				BAG4	C1orf27	BCL7A
UTP14C	C5orf51				BAG5	C1orf35	BCL7B
UVSSA	C5orf55				BAG6	C1orf50	BCL7C
VAMP2	C5orf56				BAHD1	C1orf52	BCL9
VAMP3	C5orf63				BAIAP2	C1orf53	BCL9L
VAMP4	C6orf1				BAIAP3	C1orf54	BCLAF1
VANGL1	C6orf106				BANK1	C1orf56	BCOR
VAT1	C6orf120				BANP	C1orf63	BCORL1
VCPIP1	C6orf136				BAP1	C1orf85	BCR
VILL	C6orf203				BARD1	C1orf86	BCS1L
VIM-AS1	C6orf211				BASP1	C20orf196	BDH1
VMAC	C6orf226				BATF	C20orf24	BDH2
VPS13A	C6orf47				BAX	C20orf27	BDP1
VPS18	C6orf48				BAZ1A	C20orf96	BECN1
VPS33A	C6orf57				BAZ1B	C21orf2	BEND5
VPS45	C6orf62				BAZ2A	C21orf33	BEST1
VPS54	C7orf13				BAZ2B	C21orf58	BET1
VSIG1	C7orf26				BBC3	C21orf59	BET1L
VSIG10	C7orf31				BBIP1	C21orf91	BEX2
WASL	C7orf49				BBS1	C22orf29	BEX4
WDFY1	C7orf50				BBS10	C22orf34	BEX5
WDR48	C7orf55				BBS12	C22orf39	BFAR
WFS1	C7orf60				BBS2	C22orf46	BFSP2
WWC3	C8orf33				BBS4	C2CD2L	BHLHA15
XXcos-LUCA11.4	C8orf44				BBS7	C2CD3	BHLHE41
YAE1D1	C8orf76				BBS9	C2CD5	BICD1
YBX1	C9orf114				BBX	C2orf42	BICD2
YPEL2	C9orf139				BCAP29	C2orf43	BID
ZBTB20	C9orf142				BCAR3	C2orf47	BIK
ZBTB48	C9orf156				BCAS2	C2orf49	BIN1
ZBTB6	C9orf3				BCAS3	C2orf68	BIN2
ZC2HC1A	C9orf37				BCAS4	C2orf69	BIN3
ZC2HC1B	C9orf38				BCAT1	C2orf74	BIRC2
ZC3H6	C9orf40				BCAT2	C2orf76	BIRC3
ZCCHC10	C9orf41				BCCIP	C2orf88	BIRC5
ZCCHC8	C9orf64				BCDIN3D	C3orf14	BIRC6
ZDBF2	C9orf72				BCKDHA	C3orf17	BIVM
ZDHHC14	C9orf78				BCKDHB	C3orf38	BLCAP
ZER1	C9orf85				BCKDK	C3orf52	BLK
ZFP90	C9orf89				BCL10	C4orf27	BLM
ZFYVE21	C9orf9				BCL11A	C4orf29	BLMH
ZFYVE27	C9orf91				BCL2	C4orf33	BLNK
ZHX1	CA13				BCL2A1	C4orf36	BLOC1S1
ZKSCAN8	CA5B				BCL2L1	C4orf46	BLOC1S2
ZMYM2	CAAP1				BCL2L11	C4orf48	BLOC1S5
ZNF10	CAB39				BCL2L12	C5orf15	BLOC1S6
ZNF117	CABIN1				BCL2L13	C5orf22	BLVRA
ZNF12	CACFD1				BCL2L2	C5orf24	BLVRB
ZNF138	CACUL1				BCL3	C5orf28	BLZF1
ZNF140	CAD				BCL7A	C5orf30	BMF
ZNF160	CALCOCO1				BCL7B	C5orf45	BMI1
ZNF17	CALCOCO2				BCL7C	C5orf51	BMP2K
ZNF174	CALHM2				BCL9	C5orf55	BMP8B
ZNF181	CALML4				BCL9L	C5orf56	BMPR2
ZNF189	CAMK1D				BCOR	C5orf63	BMS1
ZNF195	CAMK2D				BCORL1	C6orf1	BNIP1
ZNF212	CAMK2G				BCR	C6orf106	BNIP2
ZNF217	CAMK4				BCS1L	C6orf120	BNIP3
ZNF235	CAMKK2				BDH1	C6orf136	BNIP3L
ZNF253	CAMKMT				BDH2	C6orf203	BOD1
ZNF254	CAMLG				BDNF-AS	C6orf211	BOD1L1
ZNF266	CAMTA2				BDP1	C6orf226	BOLA1
ZNF275	CAND1				BECN1	C6orf47	BOLA2B
ZNF296	CANT1				BEND4	C6orf48	BOLA3
ZNF3	CAPG				BEND5	C6orf57	BOLA3-AS1
ZNF302	CAPN10				BEST1	C6orf62	BORA
ZNF32	CAPN10-AS1				BET1	C6orf89	BPGM
ZNF322	CAPN12				BET1L	C7orf13	BPHL
ZNF331	CAPN15				BEX2	C7orf31	BPNT1
ZNF33B	CAPN7				BEX4	C7orf43	BPTF
ZNF34	CAPNS1				BEX5	C7orf49	BRAF
ZNF341	CAPRIN2				BFAR	C7orf50	BRAP
ZNF35	CAPZA2				BFSP2	C7orf55	BRAT1
ZNF350	CARD11				BHLHA15	C7orf55-LUC7L2	BRCA1
ZNF426	CARD16				BHLHE41	C7orf60	BRCA2
ZNF429	CARD17				BICD1	C7orf73	BRCC3
ZNF480	CARD8				BICD2	C8orf33	BRD1
ZNF487	CARF				BID	C8orf44	BRD2
ZNF490	CARKD				BIN1	C8orf76	BRD3
ZNF493	CARM1				BIN3	C9orf114	BRD4
ZNF496	CARS				BIRC2	C9orf142	BRD7
ZNF506	CARS2				BIRC3	C9orf156	BRD8
ZNF512	CASC3				BIRC5	C9orf3	BRD9
ZNF518B	CASC4				BIRC6	C9orf37	BRE
ZNF561	CASC7				BIVM	C9orf40	BRF1
ZNF568	CASK				BLCAP	C9orf41	BRF2
ZNF589	CASP1				BLM	C9orf64	BRI3
ZNF595	CASP10				BLMH	C9orf72	BRI3BP
ZNF623	CASP2				BLOC1S1	C9orf78	BRIP1
ZNF66	CASP6				BLOC1S2	C9orf85	BRIX1
ZNF669	CASP7				BLOC1S3	C9orf89	BRK1
ZNF675	CASP8				BLOC1S4	C9orf9	BRMS1
ZNF691	CASP9				BLOC1S5	C9orf91	BRMS1L
ZNF7	CAST				BLOC1S6	CA5B	BROX
ZNF75D	CAT				BLVRA	CAAP1	BRPF1
ZNF76	CATSPERG				BLVRB	CAB39	BRPF3
ZNF766	CBFA2T3				BLZF1	CABIN1	BRSK1
ZNF775	CBFB				BMF	CACFD1	BRWD1
ZNF780A	CBL				BMI1	CACTIN	BRWD3
ZNF780B	CBLB				BMP2K	CACUL1	BSCL2
ZNF804A	CBLL1				BMP6	CACYBP	BSDC1
ZNF84	CBR4				BMP8B	CAD	BTAF1
ZNF852	CBWD1				BMPR1A	CADM1	BTBD1
ZNF91	CBWD3				BMPR2	CALCOCO1	BTBD10
ZNFX1	CBWD5				BMS1	CALCOCO2	BTBD2
ZNRD1-AS1	CBWD6				BNIP1	CALML4	BTBD7
ZSCAN16	CBX1				BNIP2	CAMK1D	BTBD9
ZSCAN16-AS1	CBX4				BNIP3	CAMK2G	BTD
ZSCAN2	CBX5				BNIP3L	CAMKK2	BTF3L4
ZSCAN9	CBX6				BOD1	CAMKMT	BTG1
ZYG11B	CBX7				BOD1L1	CAMLG	BTG2
ZYX	CBX8				BOLA1	CAMTA1	BTG3
	CBY1				BOLA2B	CAMTA2	BTK
	CC2D1A				BOLA3	CAND1	BTLA
	CC2D1B				BOLA3-AS1	CANT1	BTN1A1
	CCAR2				BOP1	CAP1	BTN2A1
	CCBL1				BORA	CAPG	BTN2A2
	CCBL2				BPGM	CAPN1	BTN3A1
	CCDC101				BPHL	CAPN10	BTN3A2
	CCDC104				BPNT1	CAPN10-AS1	BTN3A3
	CCDC106				BPTF	CAPN12	BTRC
	CCDC107				BRAF	CAPN15	BUB1
	CCDC109B				BRAP	CAPN2	BUB1B
	CCDC110				BRAT1	CAPN7	BUB3
	CCDC112				BRCA1	CAPNS1	BUD13
	CCDC115				BRCA2	CAPRIN1	BUD31
	CCDC117				BRCC3	CAPZA1	BYSL
	CCDC122				BRD1	CAPZA2	BZW1
	CCDC124				BRD2	CAPZB	BZW2
	CCDC125				BRD3	CARD11	C10orf118
	CCDC126				BRD4	CARD16	C10orf12
	CCDC127				BRD7	CARD8	C10orf128
	CCDC130				BRD8	CARHSP1	C10orf2
	CCDC132				BRD9	CARKD	C10orf32
	CCDC134				BRE	CARM1	C10orf54
	CCDC137				BRF1	CARS	C10orf76
	CCDC138				BRF2	CARS2	C10orf88
	CCDC14				BRI3	CASC3	C11orf1
	CCDC152				BRI3BP	CASC4	C11orf21
	CCDC159				BRIP1	CASC5	C11orf24
	CCDC163P				BRIX1	CASC7	C11orf30
	CCDC174				BRMS1	CASP1	C11orf31
	CCDC18				BRMS1L	CASP10	C11orf48
	CCDC180				BROX	CASP2	C11orf49
	CCDC22				BRPF1	CASP3	C11orf54
	CCDC23				BRPF3	CASP4	C11orf57
	CCDC25				BRSK1	CASP6	C11orf58
	CCDC28A				BRWD1	CASP7	C11orf63
	CCDC39				BRWD3	CASP8	C11orf68
	CCDC41				BSCL2	CASP9	C11orf71
	CCDC43				BSDC1	CAST	C11orf73
	CCDC50				BTAF1	CAT	C11orf80
	CCDC51				BTBD1	CBFA2T3	C11orf82
	CCDC57				BTBD10	CBFB	C11orf83
	CCDC58				BTBD2	CBL	C12orf10
	CCDC6				BTBD6	CBLL1	C12orf23
	CCDC66				BTBD7	CBR1	C12orf29
	CCDC7				BTBD9	CBR4	C12orf4
	CCDC71				BTD	CBWD1	C12orf42
	CCDC77				BTF3L4	CBWD2	C12orf43
	CCDC82				BTG1	CBWD5	C12orf44
	CCDC84				BTG3	CBX1	C12orf45
	CCDC85B				BTK	CBX4	C12orf49
	CCDC86				BTLA	CBX5	C12orf5
	CCDC88B				BTN1A1	CBX6	C12orf55
	CCDC88C				BTN2A1	CBX7	C12orf65
	CCDC9				BTN2A2	CBY1	C12orf66
	CCDC90B				BTN3A1	CC2D1A	C12orf73
	CCDC91				BTN3A3	CC2D1B	C12orf76
	CCDC92				BTRC	CCAR1	C12orf77
	CCDC93				BUB1	CCAR2	C14orf1
	CCDC94				BUB1B	CCBL1	C14orf119
	CCDC97				BUD13	CCBL2	C14orf142
	CCHCR1				BUD31	CCDC101	C14orf159
	CCL28				BVES	CCDC104	C14orf166
	CCL5				BYSL	CCDC106	C14orf28
	CCM2				BZRAP1-AS1	CCDC107	C14orf80
	CCNB1IP1				BZW1	CCDC109B	C14orf93
	CCND3				BZW2	CCDC112	C15orf39
	CCNG1				C10orf118	CCDC115	C15orf40
	CCNG2				C10orf12	CCDC117	C15orf41
	CCNH				C10orf128	CCDC12	C15orf57
	CCNK				C10orf2	CCDC124	C15orf61
	CCNL2				C10orf25	CCDC125	C15orf65
	CCNT1				C10orf32	CCDC126	C16orf13
	CCNT2				C10orf76	CCDC127	C16orf54
	CCNT2-AS1				C10orf88	CCDC130	C16orf58
	CCNY				C10orf95	CCDC132	C16orf59
	CCP110				C11orf1	CCDC134	C16orf62
	CCR10				C11orf21	CCDC137	C16orf70
	CCRL2				C11orf24	CCDC14	C16orf72
	CCS				C11orf30	CCDC142	C16orf74
	CCSAP				C11orf35	CCDC159	C16orf80
	CCSER2				C11orf48	CCDC163P	C16orf86
	CCZ1				C11orf49	CCDC174	C16orf87
	CD151				C11orf54	CCDC18	C16orf91
	CD180				C11orf57	CCDC180	C16orf93
	CD200				C11orf63	CCDC22	C16orf95
	CD200R1				C11orf65	CCDC23	C16orf98
	CD226				C11orf68	CCDC25	C17orf100
	CD27-AS1				C11orf71	CCDC28A	C17orf107
	CD2AP				C11orf73	CCDC34	C17orf49
	CD300A				C11orf80	CCDC41	C17orf51
	CD3E				C11orf82	CCDC43	C17orf53
	CD3EAP				C11orf83	CCDC47	C17orf58
	CD46				C11orf84	CCDC50	C17orf59
	CD58				C12orf10	CCDC51	C17orf62
	CD70				C12orf23	CCDC53	C17orf70
	CD80				C12orf29	CCDC57	C17orf72
	CD81				C12orf4	CCDC58	C17orf75
	CD82				C12orf42	CCDC59	C17orf80
	CD86				C12orf43	CCDC6	C17orf85
	CD99L2				C12orf44	CCDC66	C17orf89
	CDADC1				C12orf45	CCDC69	C18orf21
	CDC123				C12orf49	CCDC71	C18orf25
	CDC14A				C12orf5	CCDC82	C18orf32
	CDC14B				C12orf55	CCDC84	C18orf56
	CDC16				C12orf60	CCDC85B	C18orf8
	CDC23				C12orf61	CCDC86	C19orf12
	CDC25A				C12orf65	CCDC88B	C19orf24
	CDC25C				C12orf66	CCDC88C	C19orf25
	CDC26				C12orf73	CCDC9	C19orf38
	CDC27				C12orf74	CCDC90B	C19orf40
	CDC37L1				C12orf75	CCDC91	C19orf43
	CDC40				C12orf76	CCDC93	C19orf44
	CDC42BPB				C12orf77	CCDC94	C19orf47
	CDC42EP3				C14orf1	CCDC97	C19orf48
	CDC5L				C14orf119	CCHCR1	C19orf52
	CDC7				C14orf142	CCL5	C19orf53
	CDC73				C14orf159	CCM2	C19orf54
	CDCA7L				C14orf182	CCNB1	C19orf55
	CDHR3				C14orf28	CCNB1IP1	C19orf60
	CDIP1				C14orf80	CCNB2	C19orf66
	CDIPT				C14orf93	CCND2	C19orf68
	CDK10				C15orf39	CCND3	C19orf70
	CDK11A				C15orf40	CCNDBP1	C19orf73
	CDK11B				C15orf41	CCNF	C19orf82
	CDK12				C15orf61	CCNG1	C19orf83
	CDK13				C15orf65	CCNG2	C1D
	CDK14				C16orf13	CCNH	C1GALT1
	CDK16				C16orf46	CCNK	C1GALT1C1
	CDK17				C16orf52	CCNL1	C1QTNF6
	CDK19				C16orf54	CCNL2	C1RL
	CDK2				C16orf58	CCNT1	C1RL-AS1
	CDK5				C16orf59	CCNT2	C1orf109
	CDK5RAP1				C16orf62	CCNY	C1orf112
	CDK5RAP2				C16orf70	CCP110	C1orf122
	CDK6				C16orf72	CCR10	C1orf123
	CDK7				C16orf74	CCR2	C1orf131
	CDK8				C16orf80	CCS	C1orf159
	CDKAL1				C16orf86	CCT2	C1orf167
	CDKL5				C16orf87	CCT3	C1orf174
	CDKN1A				C16orf91	CCT4	C1orf186
	CDKN2A				C16orf93	CCT5	C1orf216
	CDKN2AIP				C16orf95	CD151	C1orf27
	CDKN2AIPNL				C16orf98	CD180	C1orf35
	CDKN2B-AS1				C17orf100	CD19	C1orf43
	CDNF				C17orf104	CD200	C1orf50
	CDPF1				C17orf107	CD27-AS1	C1orf52
	CDR2				C17orf49	CD2AP	C1orf53
	CDS2				C17orf51	CD2BP2	C1orf54
	CDV3				C17orf53	CD300A	C1orf56
	CDYL				C17orf58	CD320	C1orf61
	CEACAM21				C17orf59	CD3D	C1orf63
	CEBPD				C17orf62	CD3E	C1orf85
	CEBPG				C17orf67	CD3EAP	C1orf86
	CEBPZ				C17orf70	CD40	C20orf196
	CEBPZ-AS1				C17orf72	CD44	C20orf24
	CECR7				C17orf75	CD46	C20orf27
	CELA1				C17orf80	CD47	C20orf96
	CELF1				C17orf85	CD55	C21orf119
	CELF2				C17orf89	CD58	C21orf2
	CENPB				C18orf21	CD63	C21orf33
	CENPBD1				C18orf25	CD68	C21orf58
	CENPC				C18orf32	CD70	C21orf59
	CENPH				C18orf56	CD74	C21orf67
	CENPJ				C18orf8	CD81	C21orf91
	CENPK				C19orf10	CD82	C22orf29
	CENPL				C19orf12	CD86	C22orf34
	CENPN				C19orf24	CD8A	C22orf39
	CENPQ				C19orf25	CD97	C22orf46
	CEP104				C19orf38	CD99L2	C2CD2
	CEP120				C19orf40	CDADC1	C2CD2L
	CEP135				C19orf43	CDC123	C2CD3
	CEP152				C19orf44	CDC14B	C2CD5
	CEP164				C19orf47	CDC16	C2orf42
	CEP170				C19orf48	CDC23	C2orf43
	CEP19				C19orf52	CDC25A	C2orf44
	CEP192				C19orf54	CDC25B	C2orf47
	CEP250				C19orf55	CDC26	C2orf49
	CEP290				C19orf60	CDC27	C2orf68
	CEP350				C19orf66	CDC37	C2orf69
	CEP41				C19orf68	CDC37L1	C2orf74
	CEP44				C19orf70	CDC40	C2orf76
	CEP57				C19orf73	CDC42EP3	C2orf88
	CEP57L1				C19orf82	CDC42SE1	C3orf14
	CEP63				C19orf83	CDC42SE2	C3orf17
	CEP68				C1D	CDC5L	C3orf38
	CEP70				C1GALT1	CDC73	C3orf52
	CEP76				C1GALT1C1	CDCA3	C3orf58
	CEP78				C1QBP	CDCA4	C3orf62
	CEP85				C1QTNF6	CDCA7	C4orf21
	CEP85L				C1QTNF9B-AS1	CDCA7L	C4orf27
	CEP89				C1RL	CDHR3	C4orf29
	CEP95				C1RL-AS1	CDIP1	C4orf33
	CEP97				C1orf106	CDIPT	C4orf36
	CEPT1				C1orf109	CDK10	C4orf46
	CERK				C1orf112	CDK11A	C4orf48
	CERS2				C1orf122	CDK11B	C5AR2
	CERS4				C1orf123	CDK12	C5orf15
	CERS5				C1orf131	CDK13	C5orf22
	CERS6				C1orf159	CDK14	C5orf24
	CES2				C1orf167	CDK16	C5orf28
	CETN2				C1orf172	CDK17	C5orf30
	CETN3				C1orf174	CDK2	C5orf34
	CFD				C1orf186	CDK4	C5orf42
	CFDP1				C1orf216	CDK5	C5orf45
	CFL2				C1orf27	CDK5RAP1	C5orf51
	CGGBP1				C1orf35	CDK5RAP2	C5orf55
	CGRRF1				C1orf50	CDK5RAP3	C5orf56
	CHAC1				C1orf52	CDK6	C5orf63
	CHAF1A				C1orf53	CDK7	C6orf1
	CHAF1B				C1orf54	CDK8	C6orf106
	CHAMP1				C1orf56	CDK9	C6orf120
	CHCHD3				C1orf61	CDKAL1	C6orf136
	CHCHD4				C1orf74	CDKL5	C6orf203
	CHCHD6				C1orf85	CDKN1A	C6orf211
	CHD1				C1orf86	CDKN1B	C6orf226
	CHD1L				C20orf112	CDKN2A	C6orf47
	CHD4				C20orf196	CDKN2AIP	C6orf48
	CHD6				C20orf24	CDKN2AIPNL	C6orf52
	CHD7				C20orf27	CDKN2C	C6orf57
	CHD8				C20orf96	CDNF	C6orf62
	CHD9				C21orf119	CDPF1	C6orf89
	CHEK2				C21orf2	CDR2	C6orf99
	CHERP				C21orf33	CDS2	C7orf13
	CHFR				C21orf49	CDV3	C7orf26
	CHIC1				C21orf58	CDYL	C7orf31
	CHIC2				C21orf59	CEACAM21	C7orf43
	CHKB				C21orf67	CEBPG	C7orf49
	CHM				C21orf91	CEBPZ	C7orf50
	CHMP1A				C22orf29	CEBPZ-AS1	C7orf55
	CHMP1B				C22orf34	CECR5	C7orf55-LUC7L2
	CHMP2B				C22orf39	CECR7	C7orf60
	CHMP3				C22orf46	CELF1	C7orf73
	CHMP4A				C2CD2	CELF2	C8orf33
	CHMP4B				C2CD2L	CENPA	C8orf44
	CHMP5				C2CD3	CENPBD1	C8orf59
	CHMP6				C2CD5	CENPC	C8orf76
	CHMP7				C2orf42	CENPH	C9orf114
	CHODL				C2orf43	CENPJ	C9orf116
	CHORDC1				C2orf44	CENPK	C9orf139
	CHP1				C2orf47	CENPM	C9orf142
	CHPF2				C2orf49	CENPN	C9orf147
	CHRAC1				C2orf68	CENPO	C9orf156
	CHRNB1				C2orf69	CENPP	C9orf16
	CHST11				C2orf74	CENPQ	C9orf3
	CHST15				C2orf76	CENPT	C9orf37
	CHST2				C2orf88	CEP104	C9orf38
	CHST7				C3orf14	CEP128	C9orf40
	CHSY1				C3orf17	CEP135	C9orf41
	CHTF8				C3orf18	CEP152	C9orf64
	CHTOP				C3orf33	CEP164	C9orf69
	CHUK				C3orf38	CEP170	C9orf72
	CHURC1				C3orf52	CEP19	C9orf78
	CIAPIN1				C3orf58	CEP192	C9orf85
	CINP				C3orf62	CEP250	C9orf89
	CIPC				C3orf70	CEP350	C9orf9
	CIR1				C4orf21	CEP41	C9orf91
	CIRH1A				C4orf27	CEP44	C9orf96
	CISD1				C4orf29	CEP55	CA13
	CISD3				C4orf32	CEP57	CA5B
	CIZ1				C4orf33	CEP57L1	CAAP1
	CKAP2				C4orf36	CEP63	CAB39
	CKAP5				C4orf46	CEP70	CAB39L
	CKMT2-AS1				C4orf48	CEP76	CABIN1
	CKS1B				C5AR2	CEP78	CACFD1
	CLASP1				C5orf15	CEP85	CACTIN
	CLASP2				C5orf22	CEP85L	CACUL1
	CLASRP				C5orf24	CEP89	CACYBP
	CLCC1				C5orf28	CEP95	CAD
	CLCN3				C5orf30	CEP97	CADM1
	CLCN6				C5orf34	CEPT1	CALCOCO1
	CLDND1				C5orf42	CERCAM	CALCOCO2
	CLEC16A				C5orf45	CERK	CALHM2
	CLECL1				C5orf51	CERS2	CALML4
	CLIC3				C5orf55	CERS4	CALU
	CLIP1				C5orf56	CERS5	CAMK1D
	CLIP4				C5orf63	CES2	CAMK2D
	CLK1				C6orf1	CES4A	CAMK2G
	CLK2				C6orf106	CETN2	CAMK4
	CLK3				C6orf120	CETN3	CAMKK2
	CLK4				C6orf136	CFD	CAMKMT
	CLMN				C6orf203	CFDP1	CAMLG
	CLN3.1				C6orf211	CFL2	CAMSAP1
	CLN5				C6orf226	CGGBP1	CAMTA1
	CLN8				C6orf47	CGRRF1	CAMTA2
	CLOCK				C6orf48	CHAC1	CAND1
	CLP1				C6orf52	CHAC2	CANT1
	CLPB				C6orf57	CHAD	CANX
	CLPX				C6orf62	CHAF1A	CAP1
	CLSTN1				C6orf89	CHAF1B	CAPG
	CLSTN3				C6orf99	CHAMP1	CAPN1
	CLUAP1				C7orf13	CHCHD1	CAPN10
	CLUH				C7orf26	CHCHD10	CAPN10-AS1
	CLYBL				C7orf31	CHCHD3	CAPN12
	CMAS				C7orf43	CHCHD4	CAPN15
	CMC1				C7orf49	CHCHD5	CAPN2
	CMC2				C7orf50	CHCHD6	CAPN3
	CMIP				C7orf55	CHCHD7	CAPN7
	CMPK1				C7orf55-LUC7L2	CHD1	CAPNS1
	CMSS1				C7orf60	CHD1L	CAPRIN1
	CMTR1				C7orf73	CHD2	CAPRIN2
	CMTR2				C8orf33	CHD4	CAPZA1
	CNEP1R1				C8orf44	CHD6	CAPZA2
	CNIH4				C8orf76	CHD7	CAPZB
	CNKSR1				C8orf82	CHD8	CARD11
	CNNM2				C9orf114	CHD9	CARD16
	CNOT1				C9orf116	CHEK1	CARD6
	CNOT10				C9orf142	CHEK2	CARD8
	CNOT11				C9orf147	CHERP	CARF
	CNOT2				C9orf156	CHFR	CARHSP1
	CNOT3				C9orf3	CHIC2	CARKD
	CNOT4				C9orf37	CHID1	CARM1
	CNOT6L				C9orf38	CHKB	CARS
	CNOT8				C9orf40	CHM	CARS2
	CNPPD1				C9orf41	CHMP1A	CASC3
	CNPY2				C9orf64	CHMP1B	CASC4
	CNPY4				C9orf66	CHMP2A	CASC5
	CNST				C9orf69	CHMP2B	CASC7
	CNTRL				C9orf72	CHMP3	CASD1
	CNTROB				C9orf78	CHMP4A	CASP1
	COA1				C9orf85	CHMP4B	CASP10
	COA5				C9orf89	CHMP5	CASP2
	COA6				C9orf9	CHMP6	CASP3
	COA7				C9orf91	CHMP7	CASP4
	COASY				CA13	CHODL	CASP6
	COBLL1				CA2	CHORDC1	CASP7
	COCH				CA5B	CHP1	CASP8
	COG1				CA8	CHPF	CASP9
	COG2				CAAP1	CHPF2	CAST
	COG4				CAB39	CHRAC1	CAT
	COG5				CABIN1	CHRNB1	CATSPERG
	COG6				CABLES2	CHST11	CAV1
	COG7				CACFD1	CHST12	CBFA2T2
	COG8				CACNA2D4	CHST15	CBFA2T3
	COIL				CACNB4	CHST2	CBFB
	COL18A1				CACTIN	CHST7	CBL
	COL4A3				CACUL1	CHTF18	CBLB
	COL4A3BP				CACYBP	CHTF8	CBLL1
	COL4A4				CAD	CHTOP	CBR1
	COL9A3				CADM1	CHURC1	CBR4
	COMMD10				CADPS2	CIAO1	CBWD1
	COMMD2				CALCOCO1	CIAPIN1	CBWD2
	COMMD3				CALCOCO2	CIB1	CBWD3
	COMMD4				CALHM2	CIB3	CBWD5
	COMMD5				CALML4	CIC	CBWD6
	COMMD7				CALU	CINP	CBX1
	COMMD8				CAMK1D	CIR1	CBX3
	COMMD9				CAMK2D	CIRH1A	CBX4
	COPB1				CAMK2G	CISD1	CBX5
	COPG2				CAMK4	CISD2	CBX6
	COPS2				CAMKK2	CISD3	CBX7
	COPS3				CAMKMT	CITED2	CBY1
	COPS4				CAMLG	CIZ1	CC2D1A
	COPS7A				CAMSAP1	CKAP2	CC2D1B
	COPS7B				CAMTA1	CKAP4	CCAR1
	COQ10A				CAMTA2	CKAP5	CCAR2
	COQ10B				CAND1	CKLF	CCBL1
	COQ3				CANT1	CKS1B	CCBL2
	COQ5				CAPN1	CKS2	CCDC101
	COQ6				CAPN10	CLASP1	CCDC104
	COQ7				CAPN10-AS1	CLASP2	CCDC106
	COQ9				CAPN12	CLASRP	CCDC107
	CORO1B				CAPN15	CLCC1	CCDC109B
	CORO1C				CAPN2	CLCN3	CCDC110
	CORO7				CAPN3	CLCN6	CCDC112
	COTL1				CAPN7	CLDND1	CCDC113
	COX10				CAPNS1	CLEC16A	CCDC115
	COX11				CAPRIN1	CLECL1	CCDC117
	COX15				CAPRIN2	CLIC4	CCDC12
	COX18				CAPS	CLIP1	CCDC122
	COX19				CAPS2	CLIP4	CCDC124
	COX6A1P2				CAPZA2	CLK1	CCDC125
	CPAMD8				CARD11	CLK2	CCDC126
	CPD				CARD16	CLK3	CCDC127
	CPEB4				CARD17	CLK4	CCDC130
	CPOX				CARD6	CLMN	CCDC132
	CPPED1				CARD8	CLN3.1	CCDC134
	CPQ				CARF	CLN5	CCDC137
	CPSF1				CARHSP1	CLN6	CCDC138
	CPSF2				CARKD	CLN8	CCDC14
	CPSF3				CARM1	CLNS1A	CCDC142
	CPSF7				CARS	CLOCK	CCDC144A
	CPT1A				CARS2	CLP1	CCDC146
	CPT2				CASC3	CLPB	CCDC15
	CR1				CASC4	CLPP	CCDC150
	CR2				CASC5	CLPTM1	CCDC152
	CRADD				CASC7	CLPTM1L	CCDC159
	CRAMP1L				CASD1	CLPX	CCDC163P
	CRAT				CASP1	CLSTN1	CCDC167
	CRB3				CASP10	CLTA	CCDC174
	CRBN				CASP12	CLTB	CCDC18
	CRCP				CASP2	CLTC	CCDC180
	CREB1				CASP4	CLUAP1	CCDC22
	CREB3L2				CASP6	CLYBL	CCDC23
	CREB3L4				CASP7	CMAS	CCDC24
	CREBBP				CASP8	CMC1	CCDC25
	CREBL2				CASP9	CMC2	CCDC28A
	CREBRF				CAST	CMPK1	CCDC34
	CREBZF				CAT	CMSS1	CCDC39
	CREG1				CATSPERG	CMTM6	CCDC41
	CRELD1				CAV1	CMTM7	CCDC43
	CREM				CAV2	CMTR1	CCDC47
	CRHR1				CBFA2T2	CMTR2	CCDC50
	CRIPT				CBFA2T3	CNDP2	CCDC51
	CRK				CBFB	CNEP1R1	CCDC53
	CRKL				CBL	CNIH1	CCDC57
	CRLF3				CBLB	CNIH4	CCDC58
	CRLS1				CBLL1	CNKSR1	CCDC59
	CRNKL1				CBLN3	CNN2	CCDC6
	CROCCP2				CBR1	CNNM2	CCDC61
	CROT				CBR4	CNOT1	CCDC66
	CRTAP				CBWD1	CNOT10	CCDC69
	CRTC1				CBWD2	CNOT11	CCDC7
	CRTC2				CBWD3	CNOT2	CCDC71
	CRTC3				CBWD5	CNOT3	CCDC71L
	CRY2				CBWD6	CNOT4	CCDC77
	CRYBB1				CBX1	CNOT6L	CCDC82
	CRYL1				CBX4	CNOT7	CCDC84
	CRYZ				CBX5	CNOT8	CCDC85B
	CRYZL1				CBX6	CNP	CCDC86
	CS				CBX7	CNPPD1	CCDC88A
	CSAD				CBX8	CNPY2	CCDC88B
	CSE1L				CBY1	CNPY3	CCDC88C
	CSF2RB				CC2D1A	CNST	CCDC9
	CSGALNACT1				CC2D1B	CNTRL	CCDC90B
	CSGALNACT2				CCAR1	COA1	CCDC91
	CSNK1D				CCAR2	COA3	CCDC92
	CSNK1E				CCBL1	COA4	CCDC93
	CSNK1G1				CCBL2	COA5	CCDC94
	CSNK1G2				CCDC101	COA6	CCDC97
	CSNK1G3				CCDC102A	COA7	CCHCR1
	CSNK2A1				CCDC102B	COASY	CCL25
	CSNK2A2				CCDC104	COBLL1	CCL28
	CSNK2B				CCDC106	COCH	CCM2
	CSPP1				CCDC107	COG1	CCNA2
	CSRNP1				CCDC109B	COG2	CCNB1
	CSRP2BP				CCDC11	COG3	CCNB1IP1
	CST3				CCDC110	COG4	CCNB2
	CSTF1				CCDC112	COG5	CCNC
	CSTF2				CCDC113	COG6	CCND2
	CSTF2T				CCDC115	COG7	CCND3
	CSTF3				CCDC117	COG8	CCNDBP1
	CTA-211A9.5				CCDC12	COIL	CCNE2
	CTA-217C2.1				CCDC120	COL18A1	CCNF
	CTA-292E10.6				CCDC122	COL4A3	CCNG1
	CTA-293F17.1				CCDC124	COL4A3BP	CCNG2
	CTA-29F11.1				CCDC125	COL4A4	CCNH
	CTAGE5				CCDC126	COL9A2	CCNK
	CTB-133G6.1				CCDC127	COL9A3	CCNL1
	CTB-41I6.1				CCDC130	COMMD1	CCNL2
	CTB-55O6.12				CCDC132	COMMD10	CCNT1
	CTB-58E17.1				CCDC134	COMMD2	CCNT2
	CTBP1				CCDC137	COMMD3	CCNY
	CTBP1-AS2				CCDC138	COMMD4	CCNYL1
	CTBS				CCDC14	COMMD5	CCP110
	CTC-228N24.3				CCDC142	COMMD7	CCPG1
	CTC-241F20.3				CCDC144A	COMMD8	CCR10
	CTC-241N9.1				CCDC15	COMMD9	CCR2
	CTC-329D1.2				CCDC150	COMT	CCRL2
	CTC-338M12.4				CCDC152	COMTD1	CCS
	CTC-378H22.1				CCDC157	COPB1	CCSAP
	CTC-444N24.11				CCDC159	COPG2	CCSER2
	CTC-459F4.3				CCDC163P	COPS2	CCT2
	CTC-487M23.8				CCDC174	COPS3	CCT3
	CTC-523E23.11				CCDC18	COPS4	CCT4
	CTC-534A2.2				CCDC180	COPS5	CCT5
	CTC1				CCDC183	COPS6	CCT6A
	CTCF				CCDC19	COPS7A	CCT6B
	CTD-2020K17.1				CCDC22	COPS7B	CCT7
	CTD-2035E11.3				CCDC23	COPS8	CCT8
	CTD-2037K23.2				CCDC24	COQ10A	CCZ1
	CTD-2162K18.5				CCDC25	COQ10B	CCZ1B
	CTD-2228K2.5				CCDC28A	COQ3	CD151
	CTD-2260A17.2				CCDC28B	COQ4	CD164
	CTD-2270L9.4				CCDC34	COQ5	CD180
	CTD-2336O2.1				CCDC39	COQ6	CD19
	CTD-2353F22.1				CCDC41	COQ7	CD1D
	CTD-2509G16.5				CCDC43	COQ9	CD200
	CTD-2521M24.9				CCDC47	CORO1B	CD200R1
	CTD-2541M15.4				CCDC50	CORO1C	CD226
	CTD-3074O7.5				CCDC51	CORO7	CD27-AS1
	CTD-3138B18.5				CCDC53	COTL1	CD274
	CTD-3184A7.4				CCDC57	COX10	CD2AP
	CTD-3193K9.4				CCDC58	COX11	CD2BP2
	CTDNEP1				CCDC59	COX14	CD300A
	CTDSP1				CCDC6	COX15	CD320
	CTDSP2				CCDC61	COX16	CD3EAP
	CTDSPL2				CCDC66	COX18	CD40
	CTNNA1				CCDC69	COX19	CD44
	CTNNAL1				CCDC7	COX20	CD46
	CTNNB1				CCDC71	COX6A1P2	CD47
	CTNNBL1				CCDC71L	CPAMD8	CD55
	CTNS				CCDC77	CPEB4	CD58
	CTPS2				CCDC78	CPNE1	CD63
	CTSO				CCDC82	CPNE3	CD68
	CTSW				CCDC84	CPPED1	CD69
	CTSZ				CCDC85B	CPSF1	CD70
	CTU2				CCDC86	CPSF2	CD79B
	CUEDC2				CCDC88B	CPSF3	CD80
	CUL1				CCDC88C	CPSF3L	CD81
	CUL2				CCDC9	CPSF4	CD82
	CUL3				CCDC90B	CPSF6	CD86
	CUL4A				CCDC91	CPSF7	CD9
	CUL4B				CCDC92	CPT1A	CD97
	CUL5				CCDC93	CPT2	CD99L2
	CUL7				CCDC94	CR1	CDA
	CUL9				CCDC97	CRADD	CDADC1
	CUTC				CCHCR1	CRAT	CDAN1
	CWC15				CCL25	CRB3	CDC123
	CWC22				CCL28	CRBN	CDC14A
	CWC25				CCL3	CRCP	CDC14B
	CWC27				CCM2	CREB1	CDC16
	CWF19L1				CCNB1	CREB3	CDC23
	CWF19L2				CCNB1IP1	CREB3L2	CDC25A
	CXorf21				CCND2	CREB3L4	CDC25B
	CXorf38				CCND3	CREBBP	CDC25C
	CXorf40A				CCNDBP1	CREBL2	CDC26
	CXorf40B				CCNE1	CREBRF	CDC27
	CXorf56				CCNE2	CREBZF	CDC34
	CYB561				CCNF	CRELD1	CDC37
	CYB561D1				CCNG1	CRELD2	CDC37L1
	CYB5A				CCNG2	CREM	CDC40
	CYB5B				CCNH	CRHR1	CDC42
	CYB5D1				CCNI2	CRIPT	CDC42BPB
	CYB5D2				CCNK	CRK	CDC42EP3
	CYB5R1				CCNL2	CRKL	CDC42SE1
	CYB5R2				CCNT1	CRLF3	CDC42SE2
	CYB5R3				CCNT2	CRLS1	CDC45
	CYB5R4				CCNT2-AS1	CRNKL1	CDC5L
	CYBB				CCNY	CROCCP2	CDC6
	CYFIP1				CCNYL1	CROT	CDC7
	CYFIP2				CCP110	CRTAP	CDC73
	CYHR1				CCR2	CRTC1	CDCA2
	CYLD				CCR3	CRTC2	CDCA3
	CYP20A1				CCRL2	CRTC3	CDCA4
	CYP2R1				CCRN4L	CRY2	CDCA5
	CYP4V2				CCS	CRYBB1	CDCA7
	CYP51A1				CCSAP	CRYL1	CDCA7L
	CYSLTR1				CCSER1	CRYZ	CDCA8
	CYSTM1				CCSER2	CRYZL1	CDH23
	CYTH1				CCT6B	CS	CDHR3
	CYTH2				CCZ1	CSE1L	CDIP1
	CYTH4				CCZ1B	CSF2RB	CDIPT
	D2HGDH				CD151	CSGALNACT1	CDK1
	DAAM1				CD180	CSGALNACT2	CDK10
	DAG1				CD1D	CSK	CDK11A
	DAGLB				CD200	CSNK1A1	CDK11B
	DAK				CD200R1	CSNK1D	CDK12
	DALRD3				CD22	CSNK1E	CDK13
	DAP				CD226	CSNK1G1	CDK14
	DAP3				CD27-AS1	CSNK1G2	CDK16
	DAPK3				CD274	CSNK1G3	CDK17
	DAPP1				CD28	CSNK2A1	CDK19
	DARS2				CD2AP	CSNK2A2	CDK2
	DAZAP1				CD2BP2	CSNK2B	CDK4
	DBF4				CD300A	CSPP1	CDK5
	DBP				CD320	CSRNP1	CDK5RAP1
	DBR1				CD38	CSRP1	CDK5RAP2
	DBT				CD3EAP	CSTF1	CDK5RAP3
	DCAF10				CD40	CSTF2	CDK6
	DCAF11				CD46	CSTF2T	CDK7
	DCAF12				CD47	CSTF3	CDK8
	DCAF13				CD58	CTA-211A9.5	CDK9
	DCAF15				CD5L	CTA-217C2.1	CDKAL1
	DCAF16				CD68	CTA-292E10.6	CDKL5
	DCAF17				CD69	CTA-293F17.1	CDKN1A
	DCAF4				CD72	CTA-29F11.1	CDKN1B
	DCAF5				CD79B	CTAGE5	CDKN2A
	DCAF6				CD81	CTB-133G6.1	CDKN2AIP
	DCAF8				CD82	CTB-31O20.2	CDKN2AIPNL
	DCAKD				CD86	CTB-41I6.1	CDKN2C
	DCK				CD97	CTB-43E15.3	CDKN2D
	DCLRE1A				CD99L2	CTB-55O6.12	CDKN3
	DCLRE1C				CDADC1	CTB-58E17.1	CDNF
	DCP1A				CDAN1	CTBP1	CDPF1
	DCP1B				CDC123	CTBS	CDR2
	DCP2				CDC14A	CTC-228N24.3	CDS2
	DCTD				CDC14B	CTC-338M12.4	CDT1
	DCTN1				CDC16	CTC-444N24.11	CDV3
	DCTN4				CDC23	CTC-523E23.11	CDYL
	DCTN5				CDC25A	CTC-534A2.2	CEACAM21
	DCTN6				CDC25B	CTC1	CEBPD
	DCTPP1				CDC25C	CTCF	CEBPG
	DCUN1D1				CDC26	CTD-2037K23.2	CEBPZ
	DCUN1D4				CDC27	CTD-2186M15.3	CEBPZ-AS1
	DCUN1D5				CDC34	CTD-2228K2.5	CECR1
	DDA1				CDC37L1	CTD-2260A17.2	CECR5
	DDAH2				CDC40	CTD-2270L9.4	CECR7
	DDB2				CDC42BPB	CTD-2336O2.1	CELF1
	DDHD1				CDC42EP3	CTD-2509G16.5	CELF2
	DDHD2				CDC42SE1	CTD-2521M24.9	CENPA
	DDI2				CDC42SE2	CTD-3074O7.5	CENPB
	DDIT3				CDC45	CTD-3138B18.5	CENPBD1
	DDIT4				CDC5L	CTD-3184A7.4	CENPC
	DDX1				CDC6	CTDNEP1	CENPE
	DDX10				CDC7	CTDSP1	CENPF
	DDX19A				CDC73	CTDSP2	CENPH
	DDX19B				CDCA2	CTDSPL2	CENPI
	DDX20				CDCA3	CTNNA1	CENPJ
	DDX23				CDCA4	CTNNB1	CENPK
	DDX26B				CDCA5	CTNNBL1	CENPL
	DDX27				CDCA7	CTNS	CENPM
	DDX28				CDCA7L	CTPS1	CENPN
	DDX31				CDH1	CTPS2	CENPO
	DDX39B				CDH23	CTR9	CENPP
	DDX3X				CDHR3	CTSA	CENPQ
	DDX3Y				CDIP1	CTSB	CENPT
	DDX41				CDIPT	CTSC	CENPU
	DDX42				CDK10	CTSS	CENPW
	DDX47				CDK11A	CTSZ	CEP104
	DDX49				CDK11B	CTU2	CEP120
	DDX50				CDK12	CUEDC2	CEP128
	DDX52				CDK13	CUL1	CEP135
	DDX55				CDK14	CUL2	CEP152
	DDX56				CDK16	CUL3	CEP164
	DDX58				CDK17	CUL4A	CEP170
	DDX59				CDK19	CUL4B	CEP19
	DECR2				CDK2	CUL5	CEP192
	DEDD				CDK2AP1	CUL7	CEP250
	DEDD2				CDK4	CUL9	CEP290
	DEGS1				CDK5	CUTC	CEP350
	DENND1A				CDK5RAP1	CUX1	CEP41
	DENND1B				CDK5RAP2	CWC15	CEP44
	DENND1C				CDK5RAP3	CWC22	CEP55
	DENND2C				CDK6	CWC25	CEP57
	DENND2D				CDK7	CWC27	CEP57L1
	DENND3				CDK8	CWF19L1	CEP63
	DENND4A				CDK9	CWF19L2	CEP68
	DENND4B				CDKAL1	CXCR4	CEP70
	DENND4C				CDKL3	CXXC1	CEP72
	DENND5B				CDKL5	CXXC5	CEP76
	DENND6A				CDKN1B	CXorf21	CEP78
	DENND6B				CDKN2A	CXorf38	CEP85
	DEPDC1B				CDKN2AIP	CXorf40A	CEP85L
	DEPDC5				CDKN2AIPNL	CXorf40B	CEP89
	DEPTOR				CDKN2B-AS1	CXorf56	CEP95
	DERA				CDKN2C	CYB561	CEP97
	DESI2				CDKN2D	CYB561A3	CEPT1
	DFFA				CDKN3	CYB561D2	CERK
	DFFB				CDNF	CYB5A	CERS2
	DGAT2				CDPF1	CYB5B	CERS4
	DGCR14				CDR2	CYB5D1	CERS5
	DGCR2				CDS2	CYB5D2	CERS6
	DGCR6				CDT1	CYB5R1	CES2
	DGCR6L				CDV3	CYB5R2	CES4A
	DGCR8				CDYL	CYB5R3	CETN2
	DGKA				CEACAM1	CYB5R4	CETN3
	DGKD				CEACAM21	CYBB	CFD
	DGKE				CEBPB	CYC1	CFDP1
	DGKZ				CEBPG	CYFIP1	CFL2
	DHCR7				CEBPZ	CYFIP2	CGGBP1
	DHDDS				CEBPZ-AS1	CYHR1	CGRRF1
	DHFRL1				CECR5	CYLD	CHAC1
	DHODH				CECR7	CYP20A1	CHAC2
	DHRS1				CELF1	CYP2R1	CHAD
	DHRS12				CELF2	CYP51A1	CHAF1A
	DHRS13				CELSR1	CYSLTR1	CHAF1B
	DHRS4				CENPA	CYSTM1	CHAMP1
	DHRS4L2				CENPB	CYTH1	CHCHD1
	DHRS7B				CENPBD1	CYTH2	CHCHD10
	DHRSX				CENPC	CYTH4	CHCHD3
	DHTKD1				CENPE	D2HGDH	CHCHD4
	DHX15				CENPH	DAAM1	CHCHD5
	DHX16				CENPI	DAK	CHCHD6
	DHX29				CENPJ	DALRD3	CHCHD7
	DHX30				CENPK	DAP	CHD1
	DHX33				CENPL	DAP3	CHD1L
	DHX34				CENPM	DAPK1	CHD2
	DHX35				CENPN	DAPK3	CHD3
	DHX36				CENPO	DAPP1	CHD4
	DHX37				CENPP	DARS	CHD6
	DHX38				CENPQ	DARS2	CHD7
	DHX40				CENPT	DAXX	CHD8
	DHX57				CENPU	DAZAP1	CHD9
	DHX58				CENPV	DBF4	CHEK1
	DHX8				CENPW	DBNL	CHEK2
	DHX9				CEP104	DBR1	CHERP
	DIABLO				CEP120	DBT	CHFR
	DIAPH1				CEP128	DCAF10	CHI3L2
	DICER1				CEP135	DCAF11	CHIC1
	DICER1-AS1				CEP152	DCAF12	CHIC2
	DIDO1				CEP164	DCAF13	CHID1
	DIEXF				CEP170	DCAF15	CHKB
	DIMT1				CEP19	DCAF16	CHKB-AS1
	DIP2A				CEP192	DCAF17	CHM
	DIP2B				CEP250	DCAF4	CHML
	DIS3				CEP290	DCAF5	CHMP1A
	DIS3L				CEP350	DCAF6	CHMP1B
	DIS3L2				CEP41	DCAF7	CHMP2A
	DKC1				CEP44	DCAF8	CHMP2B
	DLAT				CEP55	DCAKD	CHMP3
	DLD				CEP57	DCK	CHMP4A
	DLEU1				CEP57L1	DCLRE1C	CHMP4B
	DLEU2L				CEP63	DCP1A	CHMP5
	DLG1				CEP68	DCP1B	CHMP6
	DLGAP4				CEP70	DCP2	CHMP7
	DLST				CEP72	DCTD	CHODL
	DMAP1				CEP76	DCTN1	CHORDC1
	DMTF1				CEP78	DCTN2	CHP1
	DMXL1				CEP85	DCTN3	CHPF
	DNAAF2				CEP85L	DCTN4	CHPF2
	DNAJA2				CEP89	DCTN5	CHPT1
	DNAJA3				CEP95	DCTN6	CHRAC1
	DNAJB1				CEP97	DCTPP1	CHRNB1
	DNAJB12				CEPT1	DCUN1D1	CHST11
	DNAJB14				CERCAM	DCUN1D5	CHST12
	DNAJB2				CERK	DCXR	CHST15
	DNAJB4				CERS2	DDA1	CHST2
	DNAJB6				CERS4	DDAH2	CHST7
	DNAJC11				CERS5	DDB1	CHSY1
	DNAJC13				CERS6	DDB2	CHTF18
	DNAJC14				CES2	DDHD1	CHTF8
	DNAJC16				CES4A	DDHD2	CHTOP
	DNAJC17				CETN2	DDI2	CHUK
	DNAJC18				CETN3	DDIT3	CHURC1
	DNAJC19				CFD	DDIT4	CIAO1
	DNAJC2				CFDP1	DDRGK1	CIAPIN1
	DNAJC21				CFL2	DDT	CIB1
	DNAJC24				CFP	DDX1	CIC
	DNAJC25				CGGBP1	DDX10	CIDEB
	DNAJC27				CGRRF1	DDX11	CINP
	DNAJC3-AS1				CHAC1	DDX18	CIPC
	DNAJC30				CHAC2	DDX19A	CIR1
	DNAL1				CHAF1A	DDX19B	CIRH1A
	DNAL4				CHAF1B	DDX20	CISD1
	DNASE1				CHAMP1	DDX21	CISD2
	DNASE1L1				CHCHD1	DDX23	CISD3
	DNM1L				CHCHD10	DDX24	CIT
	DNMBP				CHCHD2	DDX26B	CITED2
	DNMT3A				CHCHD3	DDX27	CIZ1
	DNPEP				CHCHD4	DDX28	CKAP2
	DNTTIP1				CHCHD5	DDX31	CKAP2L
	DNTTIP2				CHCHD6	DDX39A	CKAP4
	DOCK10				CHCHD7	DDX39B	CKAP5
	DOCK11				CHD1	DDX3X	CKB
	DOCK2				CHD1L	DDX41	CKLF
	DOHH				CHD2	DDX42	CKMT2-AS1
	DOK1				CHD4	DDX46	CKS1B
	DOK2				CHD6	DDX49	CKS2
	DOLK				CHD7	DDX50	CLASP1
	DOLPP1				CHD8	DDX51	CLASP2
	DONSON				CHD9	DDX52	CLASRP
	DOPEY1				CHEK1	DDX54	CLCC1
	DOPEY2				CHEK2	DDX55	CLCN3
	DOT1L				CHERP	DDX56	CLCN5
	DPCD				CHFR	DDX58	CLCN6
	DPEP1				CHI3L2	DDX59	CLCN7
	DPEP2				CHIC1	DDX6	CLDND1
	DPF2				CHIC2	DEDD	CLEC16A
	DPF3				CHID1	DEDD2	CLEC17A
	DPH1				CHIT1	DEF6	CLEC2B
	DPH2				CHKA	DEF8	CLEC2D
	DPH3				CHKB	DEGS1	CLECL1
	DPH5				CHKB-AS1	DEK	CLIC3
	DPH6				CHM	DENND1A	CLIC4
	DPH7				CHML	DENND1B	CLINT1
	DPM1				CHMP1A	DENND1C	CLIP1
	DPP3				CHMP1B	DENND2C	CLIP4
	DPP8				CHMP2A	DENND2D	CLK1
	DPP9				CHMP2B	DENND3	CLK2
	DPY19L3				CHMP3	DENND4A	CLK3
	DPY19L4				CHMP4A	DENND4B	CLK4
	DPY30				CHMP4B	DENND5B	CLMN
	DPYSL2				CHMP4C	DENND6A	CLN3.1
	DR1				CHMP5	DENND6B	CLN5
	DRAM1				CHMP6	DENR	CLN6
	DRAM2				CHMP7	DEPDC1B	CLN8
	DRG1				CHODL	DEPDC5	CLNS1A
	DRG2				CHORDC1	DERA	CLOCK
	DROSHA				CHP1	DESI1	CLP1
	DSCC1				CHPF	DESI2	CLPB
	DSCR3				CHPF2	DFFA	CLPP
	DSE				CHPT1	DFFB	CLPTM1
	DSN1				CHRAC1	DFNB59	CLPTM1L
	DSTYK				CHRNB1	DGCR14	CLPX
	DTD1				CHRNE	DGCR2	CLSPN
	DTD2				CHST11	DGCR6	CLSTN1
	DTNB				CHST12	DGCR6L	CLSTN3
	DTNBP1				CHST14	DGKA	CLTA
	DTWD1				CHST15	DGKD	CLTB
	DTWD2				CHST2	DGKE	CLTC
	DTX2				CHST7	DGUOK	CLUAP1
	DTX3				CHSY1	DHCR7	CLUH
	DUS1L				CHTF18	DHDDS	CLYBL
	DUS2				CHTF8	DHODH	CMAS
	DUS3L				CHTOP	DHPS	CMC1
	DUS4L				CHUK	DHRS1	CMC2
	DUSP11				CHURC1	DHRS13	CMIP
	DUSP12				CIAO1	DHRS4	CMPK1
	DUSP14				CIAPIN1	DHRS4L2	CMSS1
	DUSP18				CIB1	DHRS7	CMTM6
	DUSP22				CIB3	DHRS7B	CMTR1
	DUSP23				CIC	DHRSX	CMTR2
	DUSP28				CIDEB	DHTKD1	CNBP
	DUSP3				CINP	DHX15	CNDP2
	DUSP5				CIPC	DHX16	CNEP1R1
	DVL3				CIR1	DHX29	CNIH1
	DXO				CIRH1A	DHX30	CNIH3
	DYM				CISD1	DHX33	CNIH4
	DYNC1H1				CISD3	DHX34	CNKSR1
	DYNC1I2				CIT	DHX35	CNKSR2
	DYNC1LI1				CITED2	DHX36	CNN2
	DYNC1LI2				CIZ1	DHX37	CNNM2
	DYNC2LI1				CKAP2	DHX38	CNOT1
	DYNLL1-AS1				CKAP2L	DHX40	CNOT10
	DYNLL2				CKAP4	DHX57	CNOT11
	DYNLT1				CKAP5	DHX58	CNOT2
	DYNLT3				CKLF	DHX8	CNOT3
	DYRK1A				CKMT2-AS1	DHX9	CNOT4
	DYRK1B				CKS1B	DIABLO	CNOT6
	DZIP3				CKS2	DIAPH1	CNOT6L
	E2F2				CLASP1	DICER1	CNOT7
	E2F3				CLASP2	DIDO1	CNOT8
	E2F4				CLASRP	DIEXF	CNP
	E2F5				CLCC1	DIMT1	CNPPD1
	E2F6				CLCN3	DIP2A	CNPY2
	E4F1				CLCN5	DIP2B	CNPY3
	EAF1				CLCN6	DIS3	CNPY4
	EARS2				CLCN7	DIS3L	CNST
	EBAG9				CLDN12	DIS3L2	CNTLN
	EBF1				CLDND1	DKC1	CNTRL
	EBI3				CLDND2	DLAT	CNTROB
	EBNA1BP2				CLEC16A	DLD	COA1
	EBP				CLEC17A	DLEU1	COA3
	ECD				CLEC2D	DLEU2L	COA4
	ECE1				CLECL1	DLG1	COA5
	ECE2				CLGN	DLGAP4	COA6
	ECHDC1				CLHC1	DLST	COA7
	ECHDC2				CLIC3	DMAP1	COASY
	ECI1				CLIC4	DMTF1	COBLL1
	ECI2				CLIC5	DMXL1	COCH
	ECSIT				CLIP1	DNAAF2	COG1
	ECT2				CLIP4	DNAH1	COG2
	EDC3				CLK1	DNAJA1	COG3
	EDC4				CLK2	DNAJA2	COG4
	EDEM3				CLK3	DNAJA3	COG5
	EDRF1				CLK4	DNAJB1	COG6
	EEA1				CLLU1OS	DNAJB12	COG7
	EED				CLMN	DNAJB14	COG8
	EEF1A1				CLN3.1	DNAJB2	COIL
	EEF1E1				CLN5	DNAJB6	COL18A1
	EEF1G				CLN6	DNAJB9	COL19A1
	EEF2K				CLN8	DNAJC11	COL24A1
	EEFSEC				CLNS1A	DNAJC13	COL4A3
	EFCAB11				CLOCK	DNAJC14	COL4A3BP
	EFCAB14				CLP1	DNAJC16	COL4A4
	EFCAB2				CLPB	DNAJC17	COL6A3
	EFCAB4A				CLPP	DNAJC18	COL9A2
	EFCAB4B				CLPTM1	DNAJC19	COL9A3
	EFCAB7				CLPTM1L	DNAJC2	COMMD1
	EFHC1				CLPX	DNAJC21	COMMD10
	EFNA4				CLSTN1	DNAJC24	COMMD2
	EFR3A				CLSTN3	DNAJC25	COMMD3
	EFTUD1				CLTA	DNAJC27	COMMD4
	EFTUD2				CLTB	DNAJC3-AS1	COMMD5
	EGLN1				CLTC	DNAJC30	COMMD7
	EGLN2				CLUAP1	DNAJC4	COMMD8
	EHBP1				CLUH	DNAJC8	COMMD9
	EHBP1L1				CLYBL	DNAJC9	COMT
	EHD1				CMAS	DNAL1	COMTD1
	EHD3				CMC1	DNAL4	COPA
	EHD4				CMC2	DNASE1	COPB1
	EHMT1				CMC4	DNASE1L1	COPB2
	EHMT2				CMIP	DNASE2	COPG1
	EI24				CMPK1	DNM1L	COPG2
	EID2B				CMSS1	DNM2	COPS2
	EID3				CMTM6	DNMBP	COPS3
	EIF1AD				CMTM7	DNMT1	COPS4
	EIF1AY				CMTR1	DNMT3A	COPS5
	EIF1B				CMTR2	DNPEP	COPS6
	EIF2AK1				CNDP2	DNPH1	COPS7A
	EIF2AK2				CNEP1R1	DNTTIP1	COPS7B
	EIF2AK3				CNIH1	DNTTIP2	COPS8
	EIF2B1				CNIH3	DOCK10	COQ10A
	EIF2B2				CNIH4	DOCK11	COQ10B
	EIF2B3				CNKSR1	DOCK2	COQ3
	EIF2B4				CNKSR2	DOCK8	COQ4
	EIF2B5				CNNM2	DOHH	COQ5
	EIF2D				CNNM3	DOK1	COQ6
	EIF3B				CNOT1	DOK2	COQ7
	EIF3C				CNOT10	DOK3	COQ9
	EIF3J-AS1				CNOT11	DOLK	CORO1B
	EIF4E				CNOT2	DOLPP1	CORO1C
	EIF4E2				CNOT3	DONSON	CORO7
	EIF4E3				CNOT4	DOPEY1	COTL1
	EIF4EBP2				CNOT6	DPAGT1	COX10
	EIF4ENIF1				CNOT6L	DPCD	COX11
	EIF4G3				CNOT7	DPEP2	COX14
	ELAC1				CNOT8	DPF2	COX15
	ELAC2				CNP	DPF3	COX16
	ELAVL1				CNPPD1	DPH1	COX17
	ELF2				CNPY2	DPH2	COX18
	ELK1				CNPY3	DPH3	COX19
	ELK3				CNPY4	DPH5	COX20
	ELK4				CNST	DPH6	COX6A1P2
	ELMO1				CNTLN	DPH7	COX7A2L
	ELMO2				CNTRL	DPM1	CPAMD8
	ELMOD2				CNTROB	DPM2	CPD
	ELMOD3				COA1	DPP3	CPEB2
	ELOF1				COA3	DPP7	CPEB3
	ELOVL1				COA4	DPP8	CPEB4
	ELOVL5				COA5	DPP9	CPNE1
	ELP2				COA6	DPY19L3	CPNE3
	ELP3				COA7	DPY19L4	CPOX
	ELP4				COASY	DPY30	CPPED1
	ELP5				COBLL1	DR1	CPSF1
	ELP6				COCH	DRAM2	CPSF2
	EMB				COG1	DRG1	CPSF3
	EMC1				COG2	DRG2	CPSF3L
	EMC2				COG3	DROSHA	CPSF4
	EMC8				COG4	DSCC1	CPSF6
	EMC9				COG5	DSCR3	CPSF7
	EME1				COG6	DSN1	CPT1A
	EMG1				COG7	DSTYK	CPT2
	EML2				COG8	DTD1	CR1
	EML3				COIL	DTD2	CRADD
	EML5				COL18A1	DTNB	CRAT
	EML6				COL19A1	DTNBP1	CRB3
	ENAM				COL24A1	DTWD1	CRBN
	ENDOV				COL4A3	DTX2	CRCP
	ENO2				COL4A3BP	DTX3	CREB1
	ENOPH1				COL4A4	DTYMK	CREB3
	ENOSF1				COL9A2	DUS1L	CREB3L2
	ENOX2				COL9A3	DUS2	CREB3L4
	ENPP4				COLGALT1	DUS3L	CREBBP
	ENTHD2				COMMD1	DUS4L	CREBL2
	ENTPD1-AS1				COMMD10	DUSP1	CREBRF
	ENTPD3-AS1				COMMD2	DUSP11	CREBZF
	ENTPD5				COMMD3	DUSP12	CRELD1
	ENTPD6				COMMD4	DUSP14	CREM
	ENTPD7				COMMD5	DUSP22	CRHR1
	EP300				COMMD7	DUSP23	CRIP1
	EP400				COMMD8	DUSP28	CRIPT
	EP400NL				COMMD9	DUSP3	CRK
	EPB41				COMT	DUSP5	CRKL
	EPB41L2				COMTD1	DUT	CRLF3
	EPB41L4A				COPA	DVL2	CRLS1
	EPB41L4A-AS1				COPB1	DXO	CRNKL1
	EPC2				COPG2	DYM	CROCCP2
	EPG5				COPRS	DYNC1H1	CROT
	EPHA4				COPS2	DYNC1I2	CRTAP
	EPHX1				COPS3	DYNC1LI1	CRTC1
	EPHX2				COPS4	DYNC1LI2	CRTC2
	EPM2AIP1				COPS5	DYNC2LI1	CRTC3
	EPN2				COPS6	DYNLL2	CRY1
	EPOR				COPS7A	DYNLT1	CRY2
	EPS15				COPS7B	DYNLT3	CRYBB1
	EPS15L1				COPS8	DYRK1A	CRYBG3.1
	EPS8L2				COQ10A	DYRK1B	CRYL1
	EPSTI1				COQ10B	DYRK4	CRYZ
	EPT1				COQ2	DZIP3	CRYZL1
	ERAL1				COQ3	E2F2	CS
	ERBB2IP				COQ4	E2F4	CSAD
	ERC1				COQ5	E2F5	CSDE1
	ERCC1				COQ6	E2F6	CSE1L
	ERCC2				COQ7	E4F1	CSF2RB
	ERCC3				COQ9	EAPP	CSGALNACT1
	ERCC4				CORO1B	EARS2	CSGALNACT2
	ERCC5				CORO1C	EBAG9	CSK
	ERCC6L				CORO6	EBNA1BP2	CSNK1A1
	ERCC6L2				CORO7	EBP	CSNK1D
	ERCC8				CORT	ECD	CSNK1E
	ERI1				COTL1	ECE1	CSNK1G1
	ERI2				COX10	ECE2	CSNK1G2
	ERI3				COX11	ECH1	CSNK1G3
	ERICH1				COX15	ECHDC1	CSNK2A1
	ERLIN2				COX16	ECHDC2	CSNK2A2
	ERMAP				COX18	ECHS1	CSNK2B
	ERMARD				COX19	ECI1	CSPP1
	ERO1L				COX20	ECI2	CSRNP1
	ERO1LB				COX5A	ECSIT	CSRP1
	ERV3-1				COX6A1P2	EDC3	CSRP2BP
	ESCO1				CPAMD8	EDC4	CSTF1
	ESD				CPD	EDEM1	CSTF2
	ESF1				CPEB2	EDEM3	CSTF2T
	ESR1				CPEB3	EDRF1	CSTF3
	ESYT1				CPEB4	EEA1	CTA-211A9.5
	ESYT2				CPED1	EED	CTA-217C2.1
	ETAA1				CPNE1	EEF1E1	CTA-250D10.23
	ETF1				CPNE3	EEF1G	CTA-292E10.6
	ETFDH				CPNE8	EEF2K	CTA-293F17.1
	ETHE1				CPOX	EEFSEC	CTA-29F11.1
	ETS1				CPPED1	EFCAB11	CTA-384D8.34
	ETV2				CPQ	EFCAB14	CTA-445C9.14
	ETV3				CPSF1	EFCAB2	CTA-445C9.15
	ETV6				CPSF2	EFCAB4A	CTAGE5
	EVI2A				CPSF3	EFCAB7	CTB-133G6.1
	EVI2B				CPSF3L	EFHC1	CTB-31O20.2
	EVI5				CPSF4	EFHD2	CTB-41I6.1
	EXD2				CPSF6	EFNA4	CTB-43E15.3
	EXD3				CPSF7	EFR3A	CTB-43P18.1
	EXO5				CPT1A	EFTUD2	CTB-55O6.12
	EXOC1				CPT2	EHBP1	CTB-58E17.1
	EXOC2				CPXM1	EHBP1L1	CTBP1
	EXOC3				CR1	EHD1	CTBP1-AS2
	EXOC4				CR2	EHD3	CTBS
	EXOC5				CRADD	EHD4	CTC-228N24.3
	EXOC6				CRAMP1L	EHHADH	CTC-241F20.3
	EXOC6B				CRAT	EHMT1	CTC-260E6.6
	EXOC7				CRB3	EHMT2	CTC-301O7.4
	EXOC8				CRBN	EI24	CTC-329D1.2
	EXOG				CRCP	EID1	CTC-338M12.4
	EXOSC10				CREB1	EID2B	CTC-378H22.1
	EXOSC2				CREB3	EIF1AD	CTC-428G20.6
	EXOSC3				CREB3L2	EIF1B	CTC-444N24.11
	EXOSC5				CREB3L4	EIF2AK1	CTC-459F4.3
	EXOSC7				CREBBP	EIF2AK2	CTC-467M3.1
	EXOSC8				CREBL2	EIF2AK3	CTC-523E23.11
	EXOSC9				CREBRF	EIF2AK4	CTC-534A2.2
	EXT1				CREBZF	EIF2B1	CTC1
	EXT2				CREG1	EIF2B2	CTCF
	EXTL3				CRELD1	EIF2B3	CTD-2013N24.2
	EYA2				CRELD2	EIF2B4	CTD-2015H6.3
	EYA3				CREM	EIF2B5	CTD-2020K17.1
	EZH1				CRHR1	EIF2D	CTD-2020K17.4
	EZH2				CRIP2	EIF2S1	CTD-2035E11.3
	F11R				CRIPT	EIF3B	CTD-2037K23.2
	F12				CRK	EIF3C	CTD-2145A24.3
	F2R				CRKL	EIF3D	CTD-2162K18.5
	F2RL3				CRLF3	EIF3J	CTD-2186M15.3
	FA2H				CRLS1	EIF3J-AS1	CTD-2203K17.1
	FADD				CRNKL1	EIF4A2	CTD-2228K2.5
	FAF1				CROCCP2	EIF4A3	CTD-2231E14.8
	FAF2				CROT	EIF4E	CTD-2260A17.2
	FAH				CRTAP	EIF4E2	CTD-2270L9.4
	FAHD1				CRTC1	EIF4E3	CTD-2302E22.4
	FAHD2A				CRTC2	EIF4EBP1	CTD-2336O2.1
	FAHD2B				CRTC3	EIF4EBP2	CTD-2366F13.1
	FAIM				CRY1	EIF4ENIF1	CTD-2368P22.1
	FAM102A				CRY2	EIF4G1	CTD-2509G16.5
	FAM103A1				CRYBA4	EIF4G3	CTD-2521M24.9
	FAM104A				CRYBB1	EIF4H	CTD-2537I9.12
	FAM104B				CRYBB2	EIF5A2	CTD-2541M15.4
	FAM105B				CRYBG3	EIF6	CTD-2555A7.3
	FAM107B				CRYBG3.1	ELAC1	CTD-2583A14.10
	FAM109B				CRYL1	ELAC2	CTD-3065J16.9
	FAM110A				CRYZ	ELAVL1	CTD-3074O7.5
	FAM111A				CRYZL1	ELF1	CTD-3138B18.5
[truncated: 8,211 more rows]
