# Supplementary material for: Recruitment of plasma cells to the bone marrow in primary and secondary immune reactions
Source: Research Square preprint supplement (doi:10.21203/rs.3.rs-2378630/v1), 2023-02-15
Supplement: Supplementary file 4 [file 9b45bf7fc317d697f9bf65e8.xlsx]

## Sheet: Sheet1
BNT d14	BNT/BNT d7	BNT/BNT 7mo	BNT/BNT/BNT d7	COVID/BNT d7
AAMDC	AC009133.17	AL928768.3	ARPC5	CD79A
AAR2	ACAA2	ALDH9A1	CD48	MT-ATP6
AARS	ADAM15	ANKRD10	CDK2AP2	RPL13
ABCF1	AGAP2	ARHGAP4	DCAF17	RPL36
AC022182.1	ALG5	ARIH2	DENND4C	RPL37
ACAP1	ANKRA2	ATMIN	FAM46C	RPL37A
ACP1	ANKRD39	ATXN1L	HLA-DQA1	RPL41
ACSS1	ANKRD52	BANF1	HLA-DRB5	RPS19
ACTR2	AP3M1	C9orf16	LLGL2	RPS21
ADAR	ATG7	CAPN2	LRRC8A	RPS26
ADD1	ATP6V0A1	CCDC53	MT-ND4	RPS27
ADH5	ATP6V1A	CD74	PCM1	RPS28
ADPRHL2	AZI2	CDC16	PCNX	RPS29
AGK	BEND5	CDCA7L	REXO4
AHCY	BRF2	CHD8	RP11-685N3.1
AIG1	BSDC1	CIRBP	SLA
AKAP11	C14orf2	CNBP	TDRD3
AKAP9	C1orf122	CORO1B	TMEM30A
AKIRIN2	C20orf24	CREB3L4	TXNDC11
ALDH16A1	C9orf156	CSF2RB	UCK1
ALDH3A2	CANT1	DDI2	YWHAG
ALG2	CCDC43	DDIT4
ANAPC10	CD200	DDX5
ANAPC2	CD86	DDX56
ANKIB1	CDYL	DERL3
ANKRA2	CENPP	DLG1
ANKRD36C	CEP78	DYNLL1-AS1
ANP32A	CERS5	EARS2
ANXA2	CES2	EIF1
AP1S2	CHMP7	EIF4E
APPBP2	CHPF	EZH1
APPL1	CLOCK	FAM3A
ARHGAP24	CMPK1	FBXL4
ARID4B	COG1	FDX1
ARL1	COX18	FKBP15
ARL2BP	CPSF3	FRMD8
ARL6IP5	CREBBP	FUCA1
ARPC1A	CSTF3	GLIPR1
ARSA	CTBP1	HERC2
ASCC3	DAP	HIST2H2BF
ASL	DDX41	HMGCS1
ASNS	DDX54	IGJ
ATF2	DFFA	JUNB
ATF6B	DHX15	KIAA0141
ATF7IP2	DHX57	KLF13
ATG13	DNASE2	LAPTM4A
ATL3	DOHH	LILRB1
ATP2B1	DRG2	LINC00116
ATP6V1B2	E2F6	METTL3
AURKB	EI24	MGST3
BCAS2	EIF4EBP1	MINPP1
BCDIN3D	ELMOD3	MIR142
BCKDHB	EMC1	NIFK
BCL7B	EMC10	NUP155
BCLAF1	EMC9	OGFOD2
BECN1	ENC1	OS9
BET1	ENTHD2	PCAT6
BFAR	EPHX2	PMPCB
BLVRB	EPN1	POLR3GL
BMS1	ERLIN1	POMC
BOD1L1	FAM118B	PPDPF
BORA	FAM200B	PPP1R11
BPGM	FKBP8	PTPRN2
BRD2	FLYWCH2	RAB39B
BRMS1	FTSJ2	RARS2
BTLA	FTSJ3	RNASET2
BTN2A2	GALM	RP11-182L21.6
BUD31	GALNS	RP11-731F5.2
BZW1	GFM1	RPL10
C11orf49	GIMAP2	RPS6KA3
C11orf58	GINS1	RPS6KB1
C12orf23	GLRX2	SEL1L
C14orf119	GLTSCR2	SENP5
C15orf61	GMIP	SH3BP5
C17orf75	GMPS	SMG7
C19orf12	GNA13	SNRNP200
C1QBP	GPATCH11	SREK1
C1orf35	GRWD1	SRGN
C21orf91	GSK3B	SSR4
C4orf27	GSS	SUMF2
C4orf29	GTF2F2	SUPT5H
C5orf15	HAUS2	TAOK3
C6orf203	HERC4	TBCA
C6orf226	HGS	TEX264
C6orf48	HLA-DMB	TLK2
C9orf78	HSP90B1	TLR7
CACTIN	ICAM1	TMEM168
CAMK2G	IFRD2	TMEM205
CAMTA1	IL15RA	TSC22D3
CAPG	INO80C	TSPO
CAPZA1	INPP5D	TSSC4
CAPZA2	IPO9-AS1	TXNIP
CARD16	KBTBD2	UROS
CASP9	KDELR2	USP9X
CAST	LCK	VIM
CBR1	LHPP	XRN2
CBX5	LILRB4	YTHDF2
CCDC18	LRRC41	ZFAND5
CCDC41	MAP3K7	ZFP36
CCDC82	MAPKAPK3
CCDC85B	MARK2
CCDC91	MARK3
CCDC94	MCCC2
CCNG1	MCOLN1
CCPG1	MED4
CDC123	MED9
CDC25B	METTL18
CDK4	METTL21A
CDK5	MFN1
CEBPZ-AS1	MKRN1
CENPN	MLST8
CEP44	MNAT1
CHD1	MORC3
CHD8	MT-ND5
CHD9	MTERFD1
CHEK2	MTF2
CHIC2	MVK
CIR1	NAA10
CIRH1A	NAA30
CISD1	NCOR2
CLCN3	NFS1
CLECL1	NLRC5
CLIP1	NNT-AS1
CLK4	NOP16
CLNS1A	NPRL3
CNIH1	OVCA2
CNOT4	P4HB
CNOT8	P4HTM
COA7	PCNXL3
COG5	PDHX
COIL	PET112
COMMD5	PGRMC1
COMMD9	PHGDH
COPA	PHTF1
COPB1	PLEKHB2
COPS2	PNPLA2
COPS7A	POLDIP2
COTL1	POLM
COX15	POLR2D
CPEB4	POP1
CPSF6	POR
CREBL2	PPP3CA
CRKL	PPTC7
CRTAP	PRICKLE3
CSE1L	PRMT10
CSGALNACT2	PRPSAP2
CTA-293F17.1	PTPLB
CTD-2521M24.9	PTPN22
CTSS	RALBP1
CUTC	RBM14
CXXC1	RBM18
CYB5B	RBM43
CYP51A1	REC8
DAP3	RNF135
DAPP1	RNF145
DAXX	RNF166
DCAF7	RP11-313P13.5
DCK	RPIA
DDIT4	RPL7
DDRGK1	RPS16
DDX17	RPS2
DDX23	RPUSD3
DDX58	RRP1
DHRS1	RUSC1
DHX29	SAFB
DHX35	SAMD1
DICER1	SCAMP1
DIP2A	SCARB2
DNAL1	SEC22C
DNM1L	SEC61A1
DPF2	SLC17A9
DPH7	SLC35A2
DPP9	SLC35A4
DTWD1	SLC35C1
DUSP11	SLC35F2
DYNC1I2	SLC39A11
DYNC1LI1	SLC7A5
ECHDC1	SLCO3A1
EDEM3	SMARCD1
EEF1A1	SMIM19
EID1	SNAP47
EIF2A	SOCS4
EIF2B1	SPATA5L1
EIF2B4	SPCS3
EIF2B5	SSR3
EIF2S3	STARD3NL
EIF4B	STRADA
EIF4E2	SYCE1L
ELOVL1	SYNE3
EMB	TAF9B
EPB41	TBCE
ERAP1	TBXAS1
ERGIC2	TFPT
ETNK1	THUMPD3
EVI2B	TM7SF3
EXOC6	TMED10
FAM107B	TMED9
FAM127B	TMEM173
FAM179B	TMEM214
FAM21A	TMEM245
FAM21C	TMX2
FAM49B	TRAF3IP2
FAM98A	TRIM38
FAR1	TXNDC9
FAS	TXNRD1
FBXL5	UBASH3B
FBXO22	UBE2Q1
FBXO4	UBE4A
FBXW5	VAMP1
FECH	VSIG10
FIP1L1	WDFY1
FMR1	WDR25
FOXN2	WDSUB1
FRG1B	YARS2
FUOM	YTHDC2
G6PC3	ZBTB40
GABARAPL2	ZBTB43
GALC	ZCCHC10
GALE	ZDHHC24
GANC	ZDHHC5
GAR1	ZDHHC6
GDI2	ZNF493
GEMIN5	ZNF507
GGCT	ZNF576
GIGYF2	ZNF675
GK5	ZNF724P
GLO1
GLS
GNG2
GOLT1B
GON4L
GOPC
GPANK1
GRINA
GRIPAP1
GSPT1
GSPT2
GTF2H1
GTF2H5
GTF2I
GYG1
HADHB
HAGHL
HAUS5
HBS1L
HCFC1
HCFC1R1
HCFC2
HDAC9
HEBP2
HEMK1
HMBS
HMOX2
HNRNPH1
HNRNPL
HSD17B4
HYOU1
IARS
IDH3A
IDS
IFRD1
IFT43
IK
IKBKAP
IL6ST
IMMP2L
IMMT
IMPA1
INCENP
INO80B
IPO5
ISCA2
ISG15
ITFG2
JKAMP
JOSD2
KHSRP
KIAA0125
KIAA0141
KIAA0226
KIAA0586
KIAA0930
KIAA1109
KIAA1191
KIAA1551
KIF11
KIF2A
KLC1
KLHL12
KLHL9
KMT2A
KMT2E
KPNA3
KPNA6
KRR1
KRT10
KTN1
LAMP2
LANCL1
LAP3
LARP7
LCMT1
LEMD3
LEPROTL1
LIMD1
LIMK2
LRRC28
LRRC61
LTV1
LYPLA1
LYRM5
MAD1L1
MAGED1
MAGED2
MAGOH
MAGT1
MAK16
MAN1B1
MAN2A1
MANBAL
MAP3K4
MAPKAPK5-AS1
MAPRE1
MCCC1
MCM10
MDM4
MDP1
MEA1
MED1
MED13
MED21
MED29
MED30
MED4
MED8
METTL1
METTL14
METTL2B
MFNG
MFSD10
MFSD6
MIF4GD
MIIP
MKL1
MKLN1
MLH1
MMP24-AS1
MOB1A
MPST
MRPL17
MRPL24
MRPL35
MRPL41
MRPL9
MRPS18C
MRPS22
MRPS35
MRPS6
MRPS9
MSN
MTIF2
MTMR6
MTRNR2L8
MUT
N4BP2L2
NAA38
NARS
NASP
NAV1
NCBP2
NCKAP1L
NCOA4
NCOA7
NDFIP1
NEK1
NELFA
NEU1
NFKB1
NFKBIA
NFKBIB
NFX1
NIT2
NOC2L
NOSIP
NRAS
NSD1
NSL1
NUBP1
NUDCD1
NUP88
NXT1
OARD1
OBFC1
OGFOD2
OPA1
ORC3
ORC5
OSBP
OSBPL10
OSBPL3
OSBPL9
OXR1
OXSM
P2RY8
PAF1
PAICS
PAIP1
PAPD5
PARPBP
PCED1B
PCF11
PCMT1
PCSK7
PDCD10
PDE4B
PDE6D
PDHB
PDIA5
PDK1
PDLIM5
PDS5A
PEX11B
PFDN1
PFDN2
PGAP2
PGD
PHAX
PHF5A
PHKB
PIK3R4
PIN1
PIP4K2C
PITPNA-AS1
PKHD1L1
PLA2G16
PLEKHA2
PMS2
PNP
POFUT1
POLD2
POLK
POLR2K
POLR2M
PPA2
PPM1B
PPP1R15A
PPP2CB
PPP6C
PPP6R2
PPP6R3
PRAF2
PRDM1
PRKCI
PRPF3
PRPF38A
PRPF4B
PRR11
PSMA6
PSMC1
PSMD10
PSMD3
PSMD4
PSMD5
PSMG4
PSPC1
PTP4A2
PTPN2
PTPN6
PUF60
PUM1
PUM2
QRICH1
RAB4A
RAB9A
RABEP1
RABGGTB
RABL3
RAD21
RAD23A
RAD23B
RALB
RANGAP1
RAP1A
RAPGEF2
RBBP4
RBBP8
RBCK1
RBL2
RBM48
RBM5
RBMX2
RCC1
RDX
REST
RHNO1
RHOQ
RITA1
RMDN1
RNASEH2B
RNF114
RNF121
RNF13
RNF20
RNF4
RNPS1
ROCK1
RP11-111M22.2
RP11-159G9.5
RP11-284N8.3
RP11-355B11.2
RP11-421L21.3
RP11-488L18.10
RP11-505K9.1
RP11-689B22.2
RP11-85F14.5
RP4-758J18.2
RP5-1007M22.2
RP5-886K2.3
RPL13A
RPL7
RPP14
RPP30
RPUSD2
RRN3
RRP1B
RTN4
RUFY3
S100A11
S100A6
SACM1L
SAFB2
SAMD9
SAMD9L
SAR1A
SARS2
SAT2
SBDS
SCO2
SCYL1
SCYL2
SEPHS2
2011-09-01
SF3A1
SF3A3
SGOL2
SH3KBP1
SHISA5
SHQ1
SIKE1
SIRT6
SLAMF1
SLC16A7
SLC19A1
SLC25A16
SLC25A17
SLC25A22
SLC25A38
SLC25A46
SLC25A51
SLC30A7
SMAD2
SMARCA5
SMARCC1
SMARCE1
SMC4
SMC6
SMEK2
SMG1
SMNDC1
SMU1
SMYD2
SNAP23
SNRNP27
SNRNP48
SNRNP70
SNX1
SP110
SP2
SPAG1
SPAG7
SPATA20
SPG21
SPNS1
SRI
SRR
SRRT
SS18
SSH2
ST7L
STAT1
STK16
STX10
STX7
STX8
SUCLG1
SUPT16H
SUPT5H
SUPT6H
SUZ12
SYNC
TADA1
TAF6
TARS
TATDN3
TBL1XR1
TCF4
TCHP
TEX10
TGOLN2
THUMPD3
TIA1
TIMM13
TIMM44
TIMM9
TIMMDC1
TIPRL
TMA16
TMEM126B
TMEM140
TMEM147
TMEM192
TMEM230
TMEM39B
TMEM5
TMEM9
TMEM99
TMPO
TNFSF10
TPGS2
TPP2
TPRKB
TRAM2
TRAPPC13
TRAPPC4
TRAPPC6A
TRIM44
TRIP12
TRIP4
TRMT1
TRMT10B
TRMT5
TSEN34
TSPAN13
TSPAN3
TSPO
TTC1
TTI2
TUBA1A
TWISTNB
TXNL4A
U2AF1
UBE2K
UBE2L6
UBE2T
UNC13D
UNK
UPRT
USP33
USP34
USP36
USP39
USP47
USP8
UTP11L
UVRAG
VAMP3
VAPA
VDAC3
VMP1
VPS52
VTI1A
WAC
WASL
WBP2
WDR34
WDR36
WDR41
WDR48
WDR60
WDR61
WDR73
WRAP73
WTAP
WWP1
XIAP
XRCC4
XRN2
YARS
YARS2
YME1L1
ZBTB33
ZBTB8OS
ZC2HC1A
ZCCHC6
ZCRB1
ZDHHC20
ZDHHC4
ZFP14
ZFPL1
ZHX2
ZNF134
ZNF146
ZNF207
ZNF24
ZNF254
ZNF326
ZNF346
ZNF44
ZNF460
ZNF529
ZNF593
ZNF622
ZNF672
ZNF721
ZNF92
ZNHIT3
ZRSR2
ZSCAN32
