# Supplementary material for: Recruitment of plasma cells to the bone marrow in primary and secondary immune reactions
Source: Research Square preprint supplement (doi:10.21203/rs.3.rs-2378630/v1), 2023-02-15
Supplement: Supplementary file 5 [file ca9f21d69868d71020d9bbfc.xlsx]

## Sheet: Sheet1
Bone Marrow Donor ID	Age	Sex	SARS-CoV2 Vaccination status	Days after last vaccine against SARS-CoV-2	Analysis
1681	75	Male	unknown	-	scSeq
1684	50	Male	not vaccinated	-	scSeq
538	67	Male	1 time vaccinated	200	FC
539	72	Male	2 times vaccinated	153	FC
541	61	Female	2 times vaccinated	44	FC, ELISA
542	81	Male	3 times vaccinated	32	FC
543	50	Female	2 times vaccinated	138	FC
544	62	Male	2 times vaccinated	184	FC
545	67	Female	3 times vaccinated	25	FC
546	76	Female	3 times vaccinated	56	scSeq
547	51	Male	1 time vaccinated	202	scSeq
548	55	Male	2 times vaccinated	234	scSeq, FC, ELISA
549	83	Female	3 times vaccinated	88	FC, ELISA
550	55	Male	2 times vaccinated	195	FC, ELISA
552	52	Male	2 times vaccinated	130	FC, ELISA
553	43	Female	2 times vaccinated	312	scSeq, FC
554	57	Male	3 times vaccinated	35	FC
555	83	Female	3 times vaccinated	106	scSeq, FC
556	78	Female	3 times vaccinated	71	scSeq, FC, ELISA
557	80	Male	3 times vaccinated	75	FC, ELISA
558	65	Male	3 times vaccinated	85	scSeq, FC, ELISA
559	55	Female	3 times vaccinated	80	scSeq, FC, ELISA
561	61	Female	1 time vaccinated	188-218	scSeq
562	37	Female	3 times vaccinated	91	FC
563	73	Female	3 times vaccinated	132	FC
